# Supplementary material for: Spatial distribution and feeding substrate of butterflyfishes (family Chaetodontidae) on an Okinawan coral reef
Source: PeerJ. 2020 Aug 4;8:e9666. doi: 10.7717/peerj.9666 (PMC7413084; doi:10.7717/peerj.9666)
Supplement: Supplemental Information 7 [file peerj-08-9666-s007.xlsx]

## Sheet: Sheet1
Coverage (%)	(A) Branching Acropora	(B) Bottlebrush Acropora	(C)Tabular Acropora	(D) Corymbose Acropora	(E) Pocillopora	(F) Branching corals	(G) Encrusting corals	(H) Leafy corals	(I) Massive corals	(J) Mushroom corals	(K) Other corals	(L) Soft corals	(M) Dead corals	(N) Coral rubble	(O) Rocks	(P) Sand	(Q) Seaweed
KP1	0	0	0	0	0	0	27.2727	17.3554	4.95868	0	0	0	2.47934	2.47934	37.1901	8.26446	0
KP11	7.43802	0.826446	9.09091	0.826446	0.826446	4.95868	17.3554	3.30579	7.43802	0	0	0.826446	7.43802	0	38.843	0.826446	0
KP13	7.43802	0.826446	0.826446	0	0.826446	0.826446	20.6612	0.826446	4.13223	0	0	0.826446	3.30579	0	52.8926	6.61157	0
KP14	5.78512	0.826446	2.47934	0	0	5.78512	2.47934	0.826446	2.47934	0	0	0.826446	7.43802	27.2727	10.7438	33.0579	0
KP15	22.314	15.7025	0	0	0	1.65289	0	0.826446	0.826446	0	0	0	17.3554	19.0083	4.13223	18.1818	0
KP16	16.5289	4.95868	0	0	0	3.30579	0	0	0	0	0.826446	0	1.65289	19.0083	4.13223	47.9339	1.65289
KP17	2.47934	0	0.826446	0.826446	0	0.826446	0.826446	0	0.826446	0	0	0	0	16.5289	10.7438	66.1157	0
KP18	0.826446	0	1.65289	0	0	3.30579	0	0	3.30579	0	0	0	3.30579	20.6612	18.1818	48.7603	0
KP20	0	0	0.826446	0	0	0	0	0	0	0	0	0	1.65289	12.3967	2.47934	66.9421	15.7025
KP21	16.5289	4.95868	0	0	0	0.826446	0	0	0.826446	0	0	0	11.5702	6.61157	3.30579	55.3719	0
KP22	1.65289	0.826446	0.826446	0	0	0	0	0	1.65289	0	0	0	3.30579	6.61157	3.30579	81.8182	0
KP26	0.826446	0	0	0.826446	0.826446	0	8.26446	0	1.65289	0	0	4.95868	0	0	82.6446	0	0
KP27	0	0	0	0	0	0	4.95868	0	0.826446	0	0	0	0	0	93.3884	0.826446	0
KP28	0.826446	0	0	0	0	0.826446	2.47934	0	0.826446	0	0	0	0	0	85.124	9.91736	0
KP29	0	0	0	0	0	0	0	0	0.826446	0	0	0	0	7.43802	27.2727	64.4628	0
KP3	1.65289	0	0	0	0	0	0	0.826446	0.826446	0	0	0	37.1901	10.7438	1.65289	46.281	0.826446
KP30	0	0	3.30579	0.826446	0	0	0	0	0	0	0	0	2.47934	38.0165	18.1818	37.1901	0
KP31	0	0	0	0	0	0.826446	0	0	0.826446	0	0	0	1.65289	25.6198	20.6612	43.8017	6.61157
KP32	0.826446	0	0.826446	0	0	0	1.65289	0	0.826446	0	0	0	2.47934	3.30579	45.4545	44.6281	0
KP33	20.6612	2.47934	0.826446	0	1.65289	0	0	0	0	0	0	0	3.30579	22.314	2.47934	45.4545	0.826446
KP34	39.6694	0.826446	1.65289	0	0	0.826446	0.826446	0	0.826446	0	0	0	9.09091	35.5372	4.13223	6.61157	0
KP35	4.13223	0	4.13223	1.65289	1.65289	6.61157	1.65289	0	6.61157	0	0	0	3.30579	0.826446	58.6777	10.7438	0
KP36	4.95868	0.826446	0.826446	0	0	0.826446	0	0	1.65289	0	0	0	0.826446	13.2231	23.9669	52.8926	0
KP37	4.95868	0.826446	2.47934	0	0	0	0	0	0	0	0	0	0.826446	29.7521	6.61157	54.5455	0
KP38	4.95868	3.30579	0	0	0	0.826446	11.5702	0	9.91736	0.826446	0.826446	0	8.26446	9.91736	48.7603	0.826446	0
KP39	0	0	0.826446	0	0	0	2.47934	0	0	0	0	10.7438	0	0	85.124	0.826446	0
KP40	0.826446	0	0.826446	1.65289	1.65289	0	3.30579	0	0	0	0	2.47934	1.65289	0	86.7769	0.826446	0
KP41	0	0	0.826446	0	0.826446	0	4.13223	0	0.826446	0	0	7.43802	0	0	84.2975	1.65289	0
KP42	2.47934	0.826446	9.91736	0	0	1.65289	0.826446	0	1.65289	0	0	0	4.95868	40.4959	25.6198	11.5702	0
KP43	4.13223	0.826446	1.65289	0	0	1.65289	0	0	5.78512	0.826446	0	0	6.61157	47.9339	5.78512	24.7934	0
KP44	5.78512	2.47934	4.13223	0	0	4.13223	1.65289	0	9.09091	0	0	0	7.43802	42.1488	9.09091	14.0496	0
KP45	14.876	3.30579	0.826446	0	0	4.13223	5.78512	0.826446	14.0496	0	0	0	4.95868	16.5289	23.9669	5.78512	4.95868
KP5	2.47934	0	0	0	0	4.13223	0	0	0.826446	0	0.826446	0	23.9669	14.0496	12.3967	41.3223	0
KP50	4.13223	28.9256	0	0	0	1.65289	0	1.65289	0	0	0	0	36.3636	23.9669	3.30579	0	0
KP51	2.47934	0.826446	0	0	0	3.30579	0	0	0.826446	0	0	0	23.9669	23.9669	4.95868	19.0083	20.6612
KP52	0	0	0	0	0	2.47934	0.826446	0	0.826446	0	0	0	0.826446	1.65289	53.719	39.6694	0
KP53	12.3967	7.43802	0	0	0	0	0	0	0	0.826446	0	0	35.5372	4.95868	0	0	38.843
KP54	0	0	0	0	0	2.47934	0	0.826446	0	1.65289	0	0	30.5785	27.2727	3.30579	6.61157	27.2727
KP55	0	0	3.30579	0	0	0	0	0	0.826446	0	0	6.61157	6.61157	33.0579	41.3223	8.26446	0
KP56	0	0	0	0.826446	0	0.826446	5.78512	0.826446	3.30579	0	0	0.826446	2.47934	0	85.124	0	0
KP57	0	0	0	0	1.65289	0	12.3967	0.826446	0	0	0	10.7438	2.47934	0	70.2479	1.65289	0
KP58	0	0	0	0	0	0	0	0	0	0	0	0	0	0	100	0	0
KP59	0	0	0	0	0	0	1.65289	0	1.65289	0	0	0	0	0	96.6942	0	0
KP60	0	0	0	1.65289	0.826446	0	4.95868	0	1.65289	0	0	0	0	0.826446	90.0826	0	0
KP61	0	0	0	0	0	0	0	0	0	0	0	0	0	0	100	0	0
KP63	0	0	0	0	0	0	16.5289	0.826446	9.09091	0	0	4.13223	2.47934	0.826446	65.2893	0.826446	0
KP64	0	0	1.65289	0	1.65289	0	1.65289	0	2.47934	0	0	0	0	0	92.562	0	0
KP65	0	0	4.95868	0	2.47934	0	3.30579	0	4.13223	0	0	0.826446	0.826446	0	83.4711	0	0
KP68	9.91736	0.826446	22.314	1.65289	0.826446	0	2.47934	0	0	0	0	0	2.47934	7.43802	52.0661	0	0
KP69	29.7521	14.876	0	0	0	0	0.826446	0	0	0	0	0	10.7438	9.91736	2.47934	13.2231	18.1818
KP7	5.78512	0	3.30579	0	1.65289	5.78512	14.876	0.826446	4.13223	0	0	0	13.2231	0	47.9339	2.47934	0
KP70	31.405	8.26446	2.47934	0	0	0.826446	0	0	1.65289	1.65289	0	0	10.7438	19.8347	8.26446	14.876	0
KP71	0	0	4.13223	0	0	3.30579	0.826446	0	3.30579	0	0	0.826446	8.26446	0.826446	12.3967	66.1157	0
KP73	0	0	0	0	0	4.95868	0	0	0	0	0	0	59.5041	29.7521	0.826446	4.95868	0
KP74	1.65289	0	0	0	0	2.47934	0	0	0.826446	0	0	0	8.26446	3.30579	9.91736	73.5537	0
KP9	4.95868	0	3.30579	0.826446	0	9.09091	28.0992	0.826446	4.95868	0	0	0	0	1.65289	40.4959	5.78512	0
P1	0	0	0	0	0.826446	3.30579	2.47934	0	0	0	0	3.30579	4.13223	0	71.9008	14.0496	0
P10	0	0	3.30579	0.826446	0	0	22.314	0.826446	9.91736	0	0	0	11.5702	4.13223	35.5372	11.5702	0
P11	0	0	0	0	0	8.26446	5.78512	2.47934	5.78512	0	0	0	6.61157	0.826446	47.9339	22.314	0
P12	1.65289	0	0	0	0	4.13223	7.43802	0.826446	7.43802	0	0	0	6.61157	2.47934	51.2397	18.1818	0
P13	19.0083	4.95868	0	0	0	0	2.47934	0	0	3.30579	0	0	42.1488	15.7025	3.30579	0	9.09091
P2	0	0	0.826446	0	0.826446	0	0	0	3.30579	0	0	8.26446	5.78512	0	80.1653	0.826446	0
P3	0	0	0	0	0	2.47934	0	0	0	0	0	0	0	8.26446	81.8182	7.43802	0
P4	0	0	0	0	0	0	0.826446	1.65289	1.65289	0	0	0	0.826446	5.78512	88.4298	0.826446	0
P5	12.3967	7.43802	0.826446	0	0	0	0.826446	1.65289	0	0	0	0	18.1818	45.4545	10.7438	0	2.47934
P7	0	0	0	0	0	0	0	0.826446	0	5.78512	0	0	33.0579	59.5041	0	0	0.826446
P8	0	0	0	0	0	0	0	1.65289	3.30579	2.47934	0.826446	0	4.13223	72.7273	11.5702	0	3.30579
P9	0	0	2.47934	0	0	0	3.30579	1.65289	4.95868	0	0	0	4.95868	52.8926	24.7934	4.95868	0
