# Supplementary material for: Spatial distribution and feeding substrate of butterflyfishes (family Chaetodontidae) on an Okinawan coral reef
Source: PeerJ. 2020 Aug 4;8:e9666. doi: 10.7717/peerj.9666 (PMC7413084; doi:10.7717/peerj.9666)
Supplement: Supplemental Information 8 [file peerj-08-9666-s008.xlsx]

## Sheet: Sheet1
	No. of individuals (20-minutes survey)														Distance of transect (20-minutes survey)
	(A) C. baronessa	(B) C. bennetti	(C) C. lunulatus	(D) C. ornatissimus	(E) C. plebeius	(F) C. punctatofasciatus	(G) C. trifascialis	(H) C. argentatus	(I) C. citrinellus	(J) C. ephippium	(K) C. auriga	(L) C. kleinii	(M) C. vagabundus	(N) F. flavissimus	Distance (m)
KP1	0	9	12	0	11	0	0	2	0	0	0	18	3	0	335
KP11	0	0	17	3	6	2	5	0	0	2	1	2	0	2	341
KP13	0	0	10	1	6	3	2	0	1	0	1	7	2	1	343
KP14	0	2	17	0	6	0	1	2	0	0	2	1	0	1	381
KP15	0	2	26	0	1	0	0	0	0	8	6	2	0	0	430
KP16	0	2	22	0	2	0	1	0	0	0	9	0	0	0	390
KP17	0	0	8	0	0	0	2	0	0	0	4	0	2	0	307
KP18	0	2	14	0	1	0	2	0	0	4	12	0	1	0	328
KP20	0	0	1	0	0	0	0	0	0	1	2	0	0	0	387
KP21	0	0	14	0	0	0	4	1	0	1	5	0	1	0	328
KP22	0	0	7	0	0	0	0	0	0	0	7	0	0	0	361
KP26	0	0	8	0	5	0	0	1	2	2	3	0	3	1	391
KP27	0	0	3	0	0	0	0	8	0	2	1	2	0	3	406
KP28	0	0	7	0	1	4	0	5	0	0	0	2	0	6	382
KP29	0	0	3	0	0	0	0	0	0	0	2	0	9	0	399
KP3	0	0	10	0	0	0	0	2	0	1	6	1	0	0	335
KP30	0	0	5	0	0	0	0	3	0	1	2	1	0	0	370
KP31	0	0	1	0	0	0	0	0	0	0	2	0	3	2	415
KP32	0	0	6	0	0	0	6	1	1	0	0	0	1	8	321
KP33	0	0	35	0	2	0	7	3	0	0	3	4	0	0	345
KP34	0	0	24	0	0	0	2	2	0	0	5	0	0	0	312
KP35	0	0	6	0	0	3	3	8	0	0	6	0	2	2	301
KP36	0	0	11	0	2	7	1	6	0	1	1	6	2	3	377
KP37	0	0	3	0	0	0	2	8	0	1	6	3	2	0	392
KP38	2	7	21	0	2	0	0	0	0	0	2	0	4	8	332
KP39	0	0	11	0	4	0	0	0	4	0	0	0	0	1	345
KP40	0	0	5	0	3	0	0	0	3	1	0	0	2	3	321
KP41	0	1	5	5	2	0	0	0	5	0	0	5	1	3	352
KP42	0	2	5	0	0	0	8	1	0	2	7	0	3	0	351
KP43	0	0	15	0	1	0	2	2	0	2	4	1	0	0	260
KP44	0	1	11	0	0	0	0	5	0	3	8	0	0	0	288
KP45	0	2	23	0	0	0	1	0	0	4	6	1	0	2	275
KP5	0	1	3	0	4	0	0	0	0	0	0	5	3	0	340
KP50	0	0	11	0	2	0	1	0	0	0	4	5	0	1	320
KP51	0	0	14	0	1	0	0	5	0	2	4	8	0	0	305
KP52	0	1	11	0	0	0	1	9	0	0	3	8	4	5	356
KP53	0	1	36	0	2	0	0	0	0	0	0	0	0	0	352
KP54	0	1	9	0	0	0	0	5	0	1	5	10	0	0	392
KP55	0	0	3	0	7	5	2	11	0	0	1	8	3	1	377
KP56	3	0	21	1	9	0	0	0	0	0	1	0	8	1	354
KP57	0	0	6	1	4	0	0	3	3	2	0	11	1	7	381
KP58	0	1	3	0	0	0	0	3	0	2	0	0	6	2	414
KP59	0	0	3	2	3	0	1	2	3	3	0	5	4	15	369
KP60	0	0	8	1	0	0	2	0	3	1	1	10	4	9	341
KP61	0	0	2	0	0	0	0	10	1	2	1	5	3	10	421
KP63	3	0	14	2	10	0	0	3	1	0	3	12	5	5	313
KP64	0	0	11	3	3	0	0	0	9	0	0	4	5	5	439
KP65	0	1	4	0	3	4	0	12	4	2	0	9	5	5	351
KP68	0	0	25	0	2	1	8	2	2	3	4	0	3	0	279
KP69	0	0	69	0	0	0	3	0	0	1	7	0	0	0	328
KP7	3	0	10	3	1	3	0	0	0	1	1	0	0	9	316
KP70	0	2	16	0	0	0	0	1	0	2	1	0	1	1	337
KP71	0	0	10	0	0	0	4	3	0	1	6	4	3	6	394
KP73	0	0	2	0	0	0	1	1	0	1	8	3	0	0	489
KP74	0	3	16	0	0	0	0	1	0	0	5	0	4	1	382
KP9	0	0	15	3	2	0	2	0	0	0	1	7	2	5	370
P1	1	0	3	1	0	3	0	0	0	0	1	8	0	11	343
P10	5	14	27	0	8	4	2	4	0	0	8	15	12	2	233
P11	6	4	11	0	0	0	5	2	9	1	5	8	6	3	312
P12	2	1	28	0	4	0	1	5	3	0	3	3	5	2	315
P13	0	3	26	0	0	0	0	0	0	0	0	1	0	0	287
P2	0	0	4	0	2	4	0	0	0	0	0	8	0	11	323
P3	0	0	5	0	0	2	0	1	0	0	0	22	3	10	319
P4	0	0	12	0	1	12	0	0	1	0	1	1	4	6	251
P5	1	0	34	0	0	0	1	0	0	0	2	1	1	0	299
P7	0	3	21	0	4	0	0	0	0	0	3	2	0	0	312
P8	0	6	7	0	1	0	0	1	0	0	0	0	1	1	329
P9	6	4	28	1	7	7	0	4	0	5	7	7	2	4	338
