# Supplementary material for: Spatial distribution and feeding substrate of butterflyfishes (family Chaetodontidae) on an Okinawan coral reef
Source: PeerJ. 2020 Aug 4;8:e9666. doi: 10.7717/peerj.9666 (PMC7413084; doi:10.7717/peerj.9666)
Supplement: Supplemental Information 9 [file peerj-08-9666-s009.xlsx]

## Sheet: Sheet1
(A) Environmental variables				(B) Species			-0.7078	0.1618
	RDA axis 1	RDA axis 2			RDA axis 1	RDA axis 2
Bottlebrush Acropora	0.4552	0.1653		C. arg	-0.1114	-0.0408	Facultative coral polyp feeder
Branching Acropora	0.7115	0.1765		C. aur	0.5872	-0.0089	Facultative coral polyp feeder
Branching corals	0.091	0.0412		C. bar	-0.1435	0.3917	Obligate coral polyp feeder
Coral rubble	0.514	-0.0325		C. ben	0.1364	0.4666	Obligate coral polyp feeder
Corymbose Acropora	-0.0198	0.048		C. cit	-0.5012	-0.0406	Facultative coral polyp feeder
Dead corals	0.3992	0.0668		C. eph	0.1725	-0.0094	Facultative coral polyp feeder
Depth	-0.4776	0.3287		C. kle	-0.4046	0.2953	Facultative coral polyp feeder
Encrusting corals	-0.2947	0.7319		C. lun	0.5278	0.5154	Obligate coral polyp feeder
Leafy corals	-0.094	0.4546		C. orn	-0.4106	0.2726	Obligate coral polyp feeder
Massive corals	-0.0167	0.6784		C. ple	-0.3102	0.5257	Obligate coral polyp feeder
Mushroom corals	0.2248	0.1689		C. pun	-0.2868	0.1698	Obligate coral polyp feeder
Other corals	0.053	0.0749		C. tri	0.3455	-0.0014	Obligate coral polyp feeder
Pocillopora	-0.3843	0.0254		C. vag	-0.3828	0.1133	Facultative coral polyp feeder
Rock	-0.865	0.0276		F. fla	-0.7078	0.1618	Non-coralline invertebrate feeder
Sand	0.3399	-0.5193
Seaweed	0.3373	0.0263
Soft corals	-0.4388	0.012
Tabular Acropora	0.1798	0.0759
