# Supplementary material for: Spatial distribution and feeding substrate of butterflyfishes (family Chaetodontidae) on an Okinawan coral reef
Source: PeerJ. 2020 Aug 4;8:e9666. doi: 10.7717/peerj.9666 (PMC7413084; doi:10.7717/peerj.9666)
Supplement: Supplemental Information 10 [file peerj-08-9666-s010.xlsx]

## Sheet: C. baronessa
	Sample 1	Sample 2	Sample 3	Sample 4	Sample 5	Sample 6	Sample 7	Sample 8	Sample 9	Sample 10	Sample 11	Sample 12	Sample 13	Sample 14	Sample 15	Sample 16	Sample 17	Sample 18	Sample 19	Sample 20	Sample 21	Sample 22	Sample 23	Sample 24	Sample 25	Sample 26
Branching corals	0	0	2	0	1	0	0	0	0	47	7	0	0	0	0	0	0	0	0	1	0	3	0	0	0	0
Pocillopora	0	0	0	78	9	28	23	28	12	1	5	16	0	0	0	0	0	0	0	0	0	0	0	0	0	0
Branching Acropora	0	0	0	6	10	4	2	10	0	10	22	0	0	4	0	0	0	0	1	15	6	6	0	0	0	4
Bottlebrush Acropora	0	0	0	0	2	0	0	0	0	2	0	0	0	0	0	0	0	0	0	0	0	0	0	0	0	0
Corymbose Acropora	6	0	9	16	38	21	14	18	30	2	0	14	3	0	0	0	0	0	0	0	0	0	5	0	0	20
Coral rubble	0	0	0	0	0	0	0	0	0	0	0	0	0	0	0	0	0	0	0	0	0	0	0	0	0	0
Dead corals	0	0	0	0	0	0	0	0	0	0	0	0	0	0	0	0	0	0	0	0	0	0	0	0	0	0
Encrusting corals	8	3	0	1	2	11	4	3	1	0	0	0	0	0	3	0	0	0	2	2	1	0	0	0	5	0
Mushroom corals	0	0	0	0	0	0	0	0	0	0	0	0	0	0	0	0	0	0	0	0	0	0	0	0	0	0
Leafy corals	0	0	0	0	0	0	0	0	0	0	0	0	0	0	0	0	0	0	1	0	0	0	0	0	0	0
Massive corals	16	20	25	2	4	10	0	5	6	15	9	48	29	25	19	15	19	43	11	3	6	6	11	39	13	3
Rock	0	0	0	0	0	0	0	0	0	0	0	0	0	0	0	0	0	1	0	0	0	0	0	0	0	0
Sand	0	0	0	0	0	0	0	0	0	0	0	0	0	0	0	0	0	0	0	0	0	0	0	0	0	0
Seaweed	0	0	0	0	0	0	0	0	0	0	0	0	0	0	0	0	0	0	0	0	0	0	0	0	0	0
Soft corals	0	0	0	0	0	0	0	0	0	0	0	0	0	0	0	1	0	0	0	0	0	0	0	0	0	0
Tabular corals	3	14	19	9	3	1	22	0	8	0	0	13	0	0	0	0	0	2	0	1	6	18	1	3	5	0
Other corals	0	0	0	0	0	0	0	0	0	0	0	0	0	0	0	1	0	0	0	0	0	0	0	0	0	0

## Sheet: C. bennetti
	Sample 1	Sample 2	Sample 3	Sample 4	Sample 5	Sample 6	Sample 7	Sample 8	Sample 9	Sample 10	Sample 11	Sample 12	Sample 13	Sample 14	Sample 15	Sample 16	Sample 17	Sample 18	Sample 19	Sample 20	Sample 21	Sample 22
Branching corals	0	0	0	2	0	0	3	49	3	0	0	1	0	0	2	0	0	0	0	0	1	0
Pocillopora	0	3	0	0	0	0	0	0	0	0	0	0	3	0	0	0	0	0	0	1	0	0
Branching Acropora	0	0	0	0	0	0	0	0	0	0	0	0	0	0	0	0	0	0	0	0	0	0
Bottlebrush Acropora	0	0	0	0	0	2	0	0	0	0	0	0	0	0	0	0	0	0	0	0	0	0
Corymbose Acropora	0	0	0	0	0	0	0	0	0	0	0	0	0	0	0	0	0	0	0	0	0	0
Coral rubble	0	0	0	0	0	0	0	0	0	0	0	0	0	0	0	0	0	0	0	0	0	0
Dead corals	0	0	0	0	0	0	0	0	0	0	0	0	0	0	0	0	0	0	0	0	0	0
Encrusting corals	55	5	78	27	23	23	18	0	3	0	9	3	5	11	1	1	4	4	2	23	1	1
Mushroom corals	0	0	0	0	0	0	0	2	0	0	0	0	0	0	0	0	0	0	0	0	0	0
Leafy corals	0	20	0	0	0	15	0	0	0	8	10	3	3	0	0	0	0	0	0	0	0	0
Massive corals	2	25	0	3	2	2	0	0	16	9	2	16	27	19	13	12	15	8	19	4	31	23
Rock	0	0	0	0	0	0	0	0	0	5	2	8	0	0	0	0	0	0	0	0	0	0
Sand	0	0	0	0	0	0	0	0	0	0	0	0	0	0	0	0	0	0	0	0	0	0
Seaweed	0	0	0	0	0	0	0	0	0	0	0	0	0	0	0	0	0	0	0	0	0	0
Soft corals	0	0	0	4	0	0	0	0	0	0	0	0	0	0	4	0	0	0	0	0	0	0
Tabular corals	0	0	0	0	0	0	0	0	0	0	0	0	0	0	0	0	0	0	0	0	0	0
Other corals	0	0	0	0	0	0	0	0	5	0	0	0	0	0	0	0	0	2	0	0	0	0

## Sheet: C. lunulatus
	Sample 1	Sample 2	Sample 3	Sample 4	Sample 5	Sample 6	Sample 7	Sample 8	Sample 9	Sample 10	Sample 11	Sample 12	Sample 13	Sample 14	Sample 15	Sample 16	Sample 17	Sample 18	Sample 19	Sample 20	Sample 21	Sample 22	Sample 23	Sample 24	Sample 25	Sample 26	Sample 27	Sample 28
Branching corals	0	0	1	0	0	0	0	0	0	0	1	0	0	3	0	0	0	0	0	1	0	0	0	0	0	1	14	15
Pocillopora	2	0	0	0	0	0	4	0	0	0	0	12	0	2	0	0	0	0	0	0	0	0	0	0	21	0	0	0
Branching Acropora	0	0	18	3	2	3	0	0	0	0	0	6	0	0	0	0	0	0	0	0	0	0	8	3	0	1	2	2
Bottlebrush Acropora	0	0	25	3	0	0	0	0	0	0	0	0	0	0	0	0	0	0	0	0	2	2	1	10	0	0	0	0
Corymbose Acropora	0	3	0	0	0	0	0	0	5	0	2	0	0	0	7	0	0	0	0	6	0	5	0	0	18	7	19	5
Coral rubble	0	0	0	0	0	0	0	0	0	0	0	0	0	0	0	0	0	0	0	0	0	0	0	0	0	0	0	0
Dead corals	0	0	0	0	0	0	0	0	0	0	0	0	0	0	0	0	0	0	0	0	0	2	0	0	0	0	0	0
Encrusting corals	15	32	36	47	9	4	11	9	29	13	13	45	44	11	40	4	57	5	2	15	5	9	17	8	13	8	16	12
Mushroom corals	0	0	0	0	0	0	0	0	0	0	0	0	0	0	9	0	0	0	0	0	14	5	24	4	0	0	0	0
Leafy corals	0	0	0	0	0	0	0	0	0	0	0	0	0	29	0	0	0	0	0	0	0	0	0	0	0	0	0	0
Massive corals	23	9	0	11	53	84	14	27	17	10	12	35	4	13	6	70	10	0	39	6	7	0	3	0	7	16	4	4
Rock	0	0	0	0	0	0	0	1	0	0	0	0	0	0	0	0	0	0	0	0	0	0	0	0	1	0	0	0
Sand	0	0	0	0	0	0	0	0	0	0	0	0	0	0	0	0	0	0	0	0	0	0	0	0	0	0	0	0
Seaweed	0	0	0	0	0	0	0	0	0	0	0	0	0	0	0	0	0	0	0	0	0	0	0	0	0	0	0	0
Soft corals	0	0	0	0	0	0	0	0	0	0	0	0	0	0	0	0	0	0	0	0	0	0	0	0	0	0	0	0
Tabular corals	3	25	5	0	0	0	0	0	4	7	7	1	11	0	0	0	1	5	0	20	8	0	0	0	1	0	1	1
Other corals	8	0	0	0	0	0	0	5	0	3	6	0	0	1	0	0	0	0	0	0	0	0	0	0	0	0	0	0

## Sheet: C. ornatissimus
	Sample 1	Sample 2	Sample 3	Sample 4	Sample 5	Sample 6	Sample 7	Sample 8	Sample 9	Sample 10	Sample 11	Sample 12	Sample 13	Sample 14	Sample 15	Sample 16	Sample 17	Sample 18	Sample 19	Sample 20	Sample 21	Sample 22	Sample 23
Branching corals	5	4	0	0	0	0	0	0	0	0	8	0	0	0	0	0	0	0	0	2	0	0	0
Pocillopora	0	1	0	0	0	0	33	0	0	0	0	13	2	0	23	2	7	0	0	0	3	4	0
Branching Acropora	4	0	0	0	0	0	76	0	0	22	0	0	0	7	0	0	0	0	0	0	0	0	0
Bottlebrush Acropora	0	0	0	0	0	0	0	0	0	0	0	0	0	0	0	0	0	0	0	0	0	0	0
Corymbose Acropora	4	7	3	14	13	0	0	0	0	14	0	0	4	2	24	14	39	26	20	0	56	54	4
Coral rubble	0	0	0	0	0	0	0	0	0	0	0	0	0	0	0	0	0	0	0	0	0	0	0
Dead corals	0	0	0	0	0	0	0	0	0	0	0	0	0	0	0	0	0	0	0	0	0	0	0
Encrusting corals	56	2	3	84	27	18	2	27	16	9	19	15	2	30	11	12	28	36	34	14	0	0	11
Mushroom corals	0	0	0	0	0	0	0	0	0	0	0	0	0	0	0	0	0	0	0	0	0	0	0
Leafy corals	0	0	0	0	0	25	0	0	0	0	0	0	0	0	0	0	0	0	0	0	0	0	0
Massive corals	7	30	4	2	7	0	0	49	0	0	6	21	7	7	0	0	0	12	0	3	0	0	0
Rock	0	0	6	0	0	0	0	0	0	0	0	0	0	0	0	0	0	0	0	0	0	0	0
Sand	0	0	0	0	0	0	0	0	0	0	0	0	0	0	0	0	0	0	0	0	0	0	0
Seaweed	0	0	0	0	0	0	0	0	0	0	0	0	0	0	0	0	0	0	0	0	0	0	0
Soft corals	0	0	0	0	0	0	0	0	0	0	0	0	0	0	0	0	0	0	0	0	0	0	0
Tabular corals	0	0	3	0	0	0	54	0	0	0	0	0	0	18	6	11	12	4	19	3	18	9	1
Other corals	0	0	0	0	0	0	0	0	0	0	0	5	0	0	0	0	0	0	0	0	0	0	0

## Sheet: C. plebeius
	Sample 1	Sample 2	Sample 3	Sample 4	Sample 5	Sample 6	Sample 7	Sample 8	Sample 9	Sample 10	Sample 11	Sample 12	Sample 13	Sample 14	Sample 15	Sample 16	Sample 17	Sample 18	Sample 19	Sample 20	Sample 21	Sample 22
Branching corals	0	0	0	0	0	0	0	0	0	0	1	8	0	0	0	0	0	7	1	1	0	0
Pocillopora	0	0	6	0	0	0	3	0	0	14	0	0	0	0	0	0	0	0	0	0	0	1
Branching Acropora	0	2	0	0	0	0	0	0	0	1	2	5	0	0	0	17	0	0	0	0	0	1
Bottlebrush Acropora	0	0	0	0	0	0	0	0	0	0	0	0	0	0	0	0	0	0	0	0	0	0
Corymbose Acropora	0	0	0	0	0	0	0	4	0	14	0	0	2	0	0	0	0	0	0	0	0	27
Coral rubble	0	0	0	0	0	0	0	0	0	0	0	0	0	0	0	0	0	0	0	0	0	0
Dead corals	0	0	0	0	1	0	0	0	0	0	0	0	0	0	0	0	0	3	0	0	0	0
Encrusting corals	11	0	12	15	17	29	18	27	17	6	13	6	3	13	4	7	23	0	0	0	0	0
Mushroom corals	0	0	0	0	0	0	0	0	0	0	0	0	0	0	0	2	0	8	0	0	0	0
Leafy corals	5	12	0	0	0	0	0	0	0	0	0	1	4	5	5	0	0	0	20	0	0	0
Massive corals	15	5	3	5	2	1	1	5	7	12	24	10	14	1	2	2	10	9	1	0	2	2
Rock	0	0	3	0	0	0	0	0	0	0	0	1	0	0	0	0	0	0	2	12	8	0
Sand	0	0	0	0	0	0	0	0	0	0	0	0	0	0	0	0	0	0	0	0	0	0
Seaweed	0	0	0	0	0	0	0	0	0	0	0	0	0	0	0	0	0	0	0	0	0	0
Soft corals	0	0	0	0	0	0	0	0	0	0	0	0	0	0	0	0	0	0	0	0	0	0
Tabular corals	0	0	0	0	0	0	0	0	0	0	2	0	0	0	0	0	0	0	2	0	0	5
Other corals	0	0	0	0	0	0	0	0	0	0	0	0	1	0	0	0	0	0	0	0	0	0

## Sheet: C. punctatofasciatus
	Sample 1	Sample 2	Sample 3	Sample 4	Sample 5	Sample 6	Sample 7	Sample 8	Sample 9	Sample 10	Sample 11	Sample 12	Sample 13	Sample 14	Sample 15	Sample 16	Sample 17	Sample 18	Sample 19	Sample 20	Sample 21	Sample 22
Branching corals	5	0	0	0	0	0	0	0	0	0	0	0	0	0	2	0	0	0	0	0	0	0
Pocillopora	7	4	0	0	0	3	0	0	0	0	0	0	0	0	0	0	0	7	0	1	11	7
Branching Acropora	0	0	0	0	1	3	5	0	0	0	0	0	0	0	0	0	0	8	0	0	0	0
Bottlebrush Acropora	0	0	4	0	0	0	0	0	0	0	0	0	0	0	0	0	0	0	0	0	0	0
Corymbose Acropora	13	0	2	0	3	7	4	0	0	3	2	1	0	1	0	0	0	0	5	15	15	9
Coral rubble	0	0	0	0	0	0	0	0	0	0	0	0	0	0	0	0	0	0	0	0	0	0
Dead corals	0	0	0	0	0	0	0	0	0	0	0	1	1	0	0	1	0	0	0	0	0	0
Encrusting corals	21	25	23	13	8	30	16	14	4	9	7	9	16	8	6	25	40	3	17	2	2	16
Mushroom corals	0	0	0	0	0	0	0	0	0	0	0	0	0	0	0	0	0	0	0	0	0	0
Leafy corals	0	0	0	0	0	0	0	0	0	0	0	0	0	0	0	0	0	0	0	0	0	0
Massive corals	24	35	12	10	15	11	12	1	37	2	2	3	20	4	8	9	14	14	3	0	0	0
Rock	0	0	2	0	0	1	0	0	0	1	0	3	4	4	0	12	3	0	0	0	0	1
Sand	0	0	0	0	0	0	0	0	0	0	0	0	0	0	0	0	0	0	0	0	0	0
Seaweed	0	0	0	0	0	0	0	0	0	0	0	0	0	0	0	0	0	0	0	0	0	0
Soft corals	0	0	0	0	0	0	0	0	0	0	0	0	0	0	0	0	0	0	0	0	0	0
Tabular corals	0	4	5	4	0	3	5	0	0	0	0	0	0	0	0	0	0	26	0	11	2	5
Other corals	0	0	0	0	0	0	0	0	1	0	0	0	2	0	0	0	0	0	0	0	0	0

## Sheet: C. trifascialis
	Sample 1	Sample 2	Sample 3	Sample 4	Sample 5	Sample 6	Sample 7	Sample 8	Sample 9	Sample 10	Sample 11	Sample 12	Sample 13	Sample 14	Sample 15	Sample 16	Sample 17	Sample 18	Sample 19	Sample 20	Sample 21	Sample 22	Sample 23	Sample 24	Sample 25	Sample 26	Sample 27	Sample 28
Branching corals	0	0	0	0	0	0	0	0	0	0	0	0	0	0	0	0	0	0	0	0	0	0	0	0	0	0	0	0
Pocillopora	3	2	0	0	0	0	0	0	8	9	3	0	0	0	0	0	0	0	0	0	0	0	0	0	0	4	0	0
Branching Acropora	5	6	7	20	18	16	0	0	0	2	0	0	2	6	2	1	0	3	0	2	3	2	3	1	0	3	0	1
Bottlebrush Acropora	0	0	1	0	0	0	0	0	0	0	0	0	0	1	0	0	0	0	1	0	0	0	0	0	0	0	0	0
Corymbose Acropora	32	63	39	3	0	11	19	19	18	38	3	18	27	36	58	31	0	10	27	33	26	40	20	6	34	30	35	10
Coral rubble	0	0	0	0	0	0	0	0	0	0	0	0	0	0	0	0	0	0	0	0	0	0	0	0	0	0	0	0
Dead corals	0	0	0	0	0	0	0	0	0	0	0	0	0	0	0	0	0	0	0	0	0	0	0	0	0	0	0	0
Encrusting corals	1	0	0	0	0	0	0	0	0	0	0	0	0	0	4	1	0	0	0	0	0	0	0	0	0	0	0	0
Mushroom corals	0	0	0	0	0	0	0	0	0	0	0	0	0	0	0	0	0	0	0	0	0	0	0	0	0	0	0	0
Leafy corals	0	0	0	0	0	0	0	0	0	0	0	0	0	0	0	0	0	0	0	0	0	0	0	0	0	0	0	0
Massive corals	0	0	0	0	18	0	0	0	0	0	0	0	0	0	2	3	17	0	3	0	0	0	2	1	0	0	0	0
Rock	0	0	0	0	0	0	0	0	0	0	0	0	0	0	0	0	0	0	0	0	0	0	0	0	0	0	0	0
Sand	0	0	0	0	0	0	0	0	0	0	0	0	0	0	0	0	0	0	0	0	0	0	0	0	0	0	0	0
Seaweed	0	0	0	0	0	0	0	0	0	0	0	0	0	0	0	0	0	0	0	0	0	0	0	0	0	0	0	0
Soft corals	0	0	0	0	0	0	0	0	0	0	0	0	0	0	0	0	0	0	0	0	0	0	0	0	0	0	0	0
Tabular corals	13	6	23	0	0	31	2	16	36	0	57	31	9	12	13	23	0	9	24	16	9	23	6	4	5	12	27	4
Other corals	0	0	0	0	0	0	0	0	0	0	0	0	0	0	0	0	0	0	0	0	0	0	0	0	0	0	0	0
