# Supplementary material for: Spatial distribution and feeding substrate of butterflyfishes (family Chaetodontidae) on an Okinawan coral reef
Source: PeerJ. 2020 Aug 4;8:e9666. doi: 10.7717/peerj.9666 (PMC7413084; doi:10.7717/peerj.9666)
Supplement: Supplemental Information 11 [file peerj-08-9666-s011.xlsx]

## Sheet: C. argentatus
	Sample 1	Sample 2	Sample 3	Sample 4	Sample 5	Sample 6	Sample 7	Sample 8	Sample 9	Sample 10	Sample 11	Sample 12	Sample 13	Sample 14	Sample 15	Sample 16
Branching corals	0	0	0	0	0	0	0	0	0	0	0	0	0	0	0	0		0
Pocillopora	0	1	0	0	0	0	0	1	0	0	0	0	0	0	0	0		0
Branching Acropora	0	0	0	0	0	6	0	0	0	0	0	0	0	0	0	0		0
Bottlebrush Acropora	0	0	0	0	0	0	0	0	0	0	0	0	0	0	0	0		0
Corymbose Acropora	0	0	0	0	3	0	0	0	0	0	2	0	0	1	2	15		0
Coral rubble	0	0	1	5	4	4	8	0	0	0	0	0	0	0	0	0		0
Dead corals	0	8	0	1	0	8	0	2	0	0	0	0	0	0	0	0		0
Encrusting corals	4	0	9	7	10	1	0	0	2	1	18	1	7	5	0	0		1
Mushroom corals	0	0	0	0	0	0	1	0	0	0	0	0	0	0	0	0		0
Leafy corals	0	0	0	0	0	0	0	1	0	0	0	0	0	0	0	0		0
Massive corals	0	1	0	0	14	0	4	11	0	0	5	0	3	0	1	9		3
Rock	14	1	13	0	8	3	36	12	10	2	29	12	24	24	15	32		6
Sand	0	0	0	0	0	0	0	0	0	0	0	0	0	0	0	0		0
Seaweed	0	0	0	0	0	0	0	0	0	0	0	0	0	0	0	0		0
Soft corals	0	0	0	0	0	0	0	0	0	0	0	0	0	0	0	0		0
Tabular corals	0	1	0	2	8	0	0	0	0	0	0	0	0	0	0	0		0
Other corals	0	0	0	0	1	0	0	0	0	0	0	0	0	0	0	0		0

## Sheet: C. auriga
	Sample 1	Sample 2	Sample 3	Sample 4	Sample 5	Sample 6	Sample 7	Sample 8	Sample 9	Sample 10	Sample 11	Sample 12	Sample 13	Sample 14	Sample 15	Sample 16	Sample 17
Branching corals	4	0	0	0	0	0	0	0	0	0	0	0	0	0	0	0	0
Pocillopora	0	0	0	0	0	0	0	0	0	0	0	0	0	0	0	0	0
Branching Acropora	0	0	0	0	0	0	0	0	0	5	0	0	0	0	0	0	0
Bottlebrush Acropora	0	0	0	0	0	0	0	1	0	0	0	0	0	0	0	0	0
Corymbose Acropora	0	0	0	0	1	0	0	0	0	0	0	0	0	0	0	0	0
Coral rubble	0	0	0	1	0	6	29	5	16	0	0	44	4	0	5	11	0
Dead corals	0	0	0	0	0	0	0	0	0	1	0	1	0	0	0	0	0
Encrusting corals	0	0	0	0	0	0	0	0	0	0	0	0	1	1	0	0	0
Mushroom corals	0	0	0	0	0	0	0	0	0	0	0	0	0	0	0	0	0
Leafy corals	0	0	0	0	0	0	0	0	0	0	0	0	0	0	0	0	0
Massive corals	0	1	2	0	7	0	0	0	0	0	1	0	0	0	1	0	0
Rock	9	5	5	10	5	3	0	0	0	0	7	0	3	11	10	3	1
Sand	0	0	0	0	0	0	0	0	0	0	0	0	0	0	0	0	0
Seaweed	0	0	0	0	0	0	0	0	0	0	0	0	0	0	0	0	0
Soft corals	0	0	0	0	0	0	0	0	0	0	0	0	0	0	0	0	0
Tabular corals	0	0	0	0	0	0	0	0	0	0	0	0	0	0	0	0	0
Other corals	1	0	0	0	0	0	0	0	0	0	0	0	0	0	0	0	0

## Sheet: C. citrinellus
	Sample 1	Sample 2	Sample 3	Sample 4	Sample 5	Sample 6	Sample 7	Sample 8	Sample 9	Sample 10	Sample 11	Sample 12	Sample 13	Sample 14	Sample 15	Sample 16	Sample 17	Sample 18	Sample 19	Sample 20
Branching corals	0	0	0	0	0	0	0	0	0	0	0	0	0	0	0	0	0	0	0	0
Pocillopora	0	0	0	0	0	1	0	1	0	0	0	0	2	6	12	2	4	5	0	4
Branching Acropora	0	0	0	0	0	0	0	0	0	0	0	0	2	0	0	0	0	0	0	0
Bottlebrush Acropora	0	0	0	0	0	0	0	1	0	0	0	0	0	0	0	0	0	0	0	0
Corymbose Acropora	0	2	1	0	2	6	0	0	0	8	6	2	35	1	3	2	8	1	10	25
Coral rubble	0	0	0	0	0	0	0	0	0	0	0	0	0	0	0	0	0	0	0	0
Dead corals	1	0	4	15	0	0	0	0	0	0	0	0	0	0	2	0	0	0	0	0
Encrusting corals	14	28	9	3	8	10	4	2	6	0	4	0	5	12	20	0	9	9	0	1
Mushroom corals	0	0	0	0	0	0	0	0	0	0	0	0	0	0	0	0	0	0	0	0
Leafy corals	0	0	0	0	0	0	0	0	0	0	0	0	0	0	0	0	0	0	0	0
Massive corals	27	26	10	30	9	19	4	22	11	13	9	0	0	0	0	0	2	17	0	2
Rock	0	3	9	10	12	3	13	0	3	9	11	17	2	11	10	32	11	17	2	1
Sand	0	0	0	0	0	0	0	0	0	0	0	0	0	0	0	0	0	0	0	0
Seaweed	0	0	0	0	0	0	0	0	0	0	0	0	0	0	0	0	0	0	0	0
Soft corals	0	0	0	0	0	0	0	0	0	0	0	0	0	0	0	0	0	0	0	0
Tabular corals	0	0	0	0	0	0	0	4	3	0	0	0	7	0	0	0	0	0	3	0
Other corals	0	0	0	0	0	0	1	0	0	0	0	0	0	0	0	0	0	0	0	0

## Sheet: C. ephippium
	Sample 1	Sample 2	Sample 3	Sample 4	Sample 5	Sample 6	Sample 7	Sample 8	Sample 9	Sample 10	Sample 11	Sample 12	Sample 13	Sample 14	Sample 15	Sample 16
Branching corals	0	0	0	0	0	0	0	0	0	0	0	0	0	0	0	0
Pocillopora	0	0	0	0	0	0	0	0	0	0	0	0	0	0	0	2
Branching Acropora	0	0	0	0	0	0	0	0	0	0	0	0	0	0	0	0
Bottlebrush Acropora	0	0	0	0	0	0	0	0	0	0	0	0	0	0	0	0
Corymbose Acropora	0	0	0	0	0	0	0	0	0	0	0	0	0	0	0	0
Coral rubble	0	0	22	39	0	0	0	2	2	4	4	0	0	0	0	0
Dead corals	69	54	18	12	7	35	35	25	33	13	4	0	0	1	0	19
Encrusting corals	0	0	2	0	0	0	0	0	0	0	0	0	0	0	0	0
Mushroom corals	0	0	0	0	0	0	0	0	0	0	0	0	0	0	0	0
Leafy corals	0	0	0	0	0	0	0	0	0	0	0	0	0	0	0	0
Massive corals	1	0	0	0	0	0	0	0	0	0	0	1	0	0	0	0
Rock	1	6	0	2	10	13	7	21	0	2	13	62	47	38	20	0
Sand	0	0	0	0	0	0	0	0	0	0	0	0	0	0	0	0
Seaweed	0	0	0	0	0	0	0	0	0	0	0	0	0	0	0	0
Soft corals	0	0	0	0	0	0	0	0	0	0	0	0	0	0	0	0
Tabular corals	0	0	0	0	0	0	0	0	0	0	0	0	0	0	0	0
Other corals	0	0	0	0	0	0	0	0	0	0	0	0	0	0	0	0

## Sheet: C. kleinii
	Sample 1	Sample 2	Sample 3	Sample 4	Sample 5	Sample 6	Sample 7	Sample 8	Sample 9	Sample 10	Sample 11	Sample 12	Sample 13	Sample 14	Sample 15	Sample 16	Sample 17	Sample 18	Sample 19	Sample 20	Sample 21	Sample 22	Sample 23	Sample 24
Branching corals	0	0	0	0	0	0	0	3	0	0	0	3	0	11	0	2	0	0	0	15	35	0	0	0
Pocillopora	0	0	0	0	0	0	0	0	0	0	0	0	0	0	0	0	0	0	0	0	0	0	0	0
Branching Acropora	0	0	1	6	0	0	0	0	0	0	0	0	0	0	0	0	0	0	0	0	0	0	0	0
Bottlebrush Acropora	0	0	0	0	0	0	0	0	0	0	0	0	0	0	0	0	0	0	0	0	0	0	0	0
Corymbose Acropora	2	0	3	3	0	10	0	0	16	0	0	0	2	0	4	0	1	0	0	0	0	0	0	0
Coral rubble	0	0	0	0	0	0	0	0	0	0	0	0	0	0	0	0	0	0	0	2	0	0	0	0
Dead corals	1	0	0	0	0	9	0	0	0	0	0	0	0	0	0	0	0	0	1	1	13	0	0	2
Encrusting corals	10	9	16	6	2	0	11	15	4	2	7	47	6	2	19	24	15	11	13	3	0	0	0	1
Mushroom corals	0	0	0	0	0	0	0	0	0	0	0	0	0	0	0	0	0	0	0	0	0	0	0	0
Leafy corals	0	0	0	0	0	0	0	0	0	0	0	0	0	0	0	4	0	0	0	3	0	0	0	0
Massive corals	3	3	1	0	8	6	9	26	6	17	2	33	2	11	2	6	6	0	6	1	0	14	20	7
Rock	5	3	0	0	0	0	0	0	0	10	7	0	0	0	0	0	0	1	0	5	0	1	10	25
Sand	0	0	0	0	0	0	0	0	0	0	0	0	0	0	0	0	0	0	0	0	0	0	0	0
Seaweed	0	0	0	0	0	0	0	0	0	0	0	0	0	0	0	0	0	0	0	0	0	0	0	0
Soft corals	0	0	1	0	0	0	3	0	0	0	0	0	0	0	0	0	0	0	0	0	0	0	0	0
Tabular corals	0	0	1	0	0	0	0	0	0	0	3	0	0	13	2	0	1	0	4	0	0	0	0	0
Other corals	0	0	0	0	0	0	0	0	0	0	0	0	0	4	0	1	2	0	0	0	0	0	0	0

## Sheet: C. vagabundus
	Sample 1	Sample 2	Sample 3	Sample 4	Sample 5	Sample 6	Sample 7	Sample 8	Sample 9	Sample 10	Sample 11	Sample 12	Sample 13	Sample 14	Sample 15	Sample 16	Sample 17	Sample 18	Sample 19	Sample 20	Sample 21	Sample 22	Sample 23	Sample 24	Sample 25	Sample 26	Sample 27	Sample 28	Sample 29	Sample 30
Branching corals	0	0	0	0	0	0	0	0	0	0	0	0	0	0	0	0	0	0	0	0	0	0	0	0	0	0	0	0	0	0
Pocillopora	0	0	0	0	0	15	0	0	0	0	0	0	0	0	0	0	0	0	0	0	0	0	0	0	0	0	0	0	0	0
Branching Acropora	0	0	1	1	1	2	0	0	0	0	0	0	0	0	0	0	0	0	0	0	0	0	0	0	0	0	0	0	0	0
Bottlebrush Acropora	0	0	0	0	0	0	0	0	0	0	0	0	0	0	0	0	0	0	0	0	0	0	0	0	0	0	0	0	0	0
Corymbose Acropora	0	0	0	3	0	0	0	0	0	0	0	0	0	0	0	0	0	0	0	0	0	0	0	0	0	0	0	0	0	1
Coral rubble	6	0	3	5	2	0	0	0	0	0	0	0	0	0	0	0	0	0	0	0	0	0	0	0	4	0	0	0	0	0
Dead corals	9	3	0	3	0	0	0	0	3	11	0	0	0	0	0	0	0	0	0	0	0	0	1	6	0	2	3	0	0	0
Encrusting corals	0	0	1	0	0	0	0	0	0	16	12	0	0	0	0	0	0	0	0	0	0	0	0	0	0	0	1	0	0	0
Mushroom corals	0	1	0	1	0	0	0	0	0	0	0	0	0	0	0	0	0	0	0	0	0	0	0	0	0	0	0	0	0	0
Leafy corals	0	0	0	0	0	0	0	0	0	0	0	0	0	0	0	0	0	0	0	0	0	0	0	0	0	0	0	0	0	0
Massive corals	1	2	0	0	0	12	4	0	10	14	0	80	3	46	0	0	3	12	3	19	0	0	0	0	1	4	2	1	0	6
Rock	4	9	9	1	2	25	29	32	8	5	6	0	23	0	25	32	42	22	21	6	20	25	35	48	16	18	18	14	6	9
Sand	0	0	0	0	0	0	0	0	0	0	0	0	0	0	0	0	0	0	0	0	0	0	0	0	0	0	0	0	1	0
Seaweed	0	0	0	0	0	0	0	0	0	0	0	0	0	0	0	0	0	0	0	0	0	0	0	0	0	0	0	0	0	0
Soft corals	0	0	0	0	0	0	0	0	0	0	0	0	0	0	0	0	0	0	0	0	0	0	0	0	0	0	0	8	3	0
Tabular corals	0	0	0	0	0	2	0	0	0	0	0	0	0	0	0	0	0	0	0	0	0	0	0	0	0	0	0	0	0	0
Other corals	0	0	0	0	0	0	0	0	0	0	0	0	0	0	0	0	0	0	0	0	0	0	0	0	0	0	0	0	0	0

## Sheet: F. flavissimus
	Sample 1	Sample 2	Sample 3	Sample 4	Sample 5	Sample 6	Sample 7	Sample 8	Sample 9	Sample 10	Sample 11	Sample 12	Sample 13	Sample 14	Sample 15	Sample 16	Sample 17	Sample 18	Sample 19	Sample 20	Sample 21	Sample 22	Sample 23	Sample 24	Sample 25	Sample 26	Sample 27	Sample 28	Sample 29	Sample 30	Sample 31	Sample 32	Sample 33	Sample 34	Sample 35	Sample 36	Sample 37	Sample 38	Sample 39	Sample 40	Sample 41	Sample 42	Sample 43	Sample 44	Sample 45	Sample 46	Sample 47	Sample 48	Sample 49
Branching corals	0	0	0	0	0	0	0	0	0	0	0	0	0	0	0	0	0	0	0	0	0	0	0	0	0	0	0	0	0	0	0	0	0	0	0	0	0	0	0	0	0	0	0	0	0	0	0	0	0
Pocillopora	0	0	0	0	0	0	0	0	0	0	0	0	0	0	0	0	0	0	0	0	0	1	0	0	0	0	0	0	0	0	0	0	0	0	0	5	2	46	0	0	4	2	1	0	0	0	0	0	0
Branching Acropora	0	0	0	0	0	0	0	0	0	0	0	0	0	0	0	0	0	0	0	0	0	0	0	0	0	0	0	1	0	0	1	0	0	0	0	0	0	0	0	0	0	0	0	0	0	0	0	0	0
Bottlebrush Acropora	0	0	0	0	0	0	0	0	0	0	0	0	0	0	0	0	0	0	0	0	0	0	0	0	0	0	0	0	0	0	0	0	0	0	0	0	0	0	0	0	0	0	0	0	0	0	0	0	0
Corymbose Acropora	0	0	0	0	0	0	0	0	13	14	0	1	2	0	0	2	3	2	22	0	1	5	0	0	0	0	0	0	0	0	0	0	0	0	0	0	0	0	0	0	1	0	0	0	0	0	0	0	0
Coral rubble	0	0	0	0	0	0	0	0	0	0	0	0	0	0	0	0	0	0	0	0	2	0	0	0	0	0	3	13	1	0	0	0	0	0	0	0	0	0	0	0	0	0	0	0	0	0	0	0	0
Dead corals	0	0	0	0	1	1	0	0	0	0	0	0	0	0	0	0	0	0	0	0	0	0	0	2	2	6	0	1	0	1	1	4	4	0	0	0	3	0	0	0	0	0	0	0	0	0	0	0	0
Encrusting corals	0	0	0	0	0	0	0	0	0	1	0	0	0	0	0	0	0	0	0	0	0	0	0	0	0	0	0	0	0	0	0	0	0	0	0	0	0	0	0	0	0	0	0	1	0	0	0	0	0
Mushroom corals	0	0	0	0	0	0	0	0	0	0	0	0	0	0	0	0	0	0	0	0	0	0	0	0	0	0	0	1	4	0	0	0	0	0	0	0	0	0	0	0	0	0	0	0	0	0	0	0	0
Leafy corals	0	0	0	0	0	0	0	0	0	0	0	0	0	0	0	0	0	0	0	0	0	0	0	0	0	0	0	0	0	0	0	0	0	0	0	0	0	0	0	0	0	0	0	0	0	0	0	0	0
Massive corals	0	0	0	1	0	0	0	0	0	0	0	0	0	0	0	0	0	0	0	0	0	0	2	0	0	0	1	1	0	0	0	0	0	0	1	0	0	0	0	0	0	0	0	0	0	0	0	0	0
Rock	9	7	4	9	3	7	3	3	2	6	5	7	3	4	6	5	10	5	1	4	5	9	3	2	4	3	3	1	3	9	12	2	8	1	8	5	8	6	28	20	25	34	12	10	9	11	20	9	6
Sand	0	0	0	0	0	0	0	0	0	0	0	0	0	0	0	0	0	0	0	0	0	0	0	0	0	0	0	0	0	0	0	0	0	0	0	0	0	0	0	0	0	0	0	0	0	0	0	0	0
Seaweed	0	0	0	0	0	0	0	0	0	0	0	0	0	0	0	0	0	0	0	0	0	0	0	0	0	0	0	0	0	0	0	0	0	0	0	0	0	0	0	0	0	0	0	0	0	0	0	0	0
Soft corals	0	0	0	0	0	0	0	0	0	0	0	0	0	0	0	0	0	0	0	0	0	0	0	0	0	0	0	0	0	0	0	0	0	0	0	0	0	0	0	0	0	0	0	0	0	0	0	0	0
Tabular corals	0	2	0	0	0	0	0	0	0	2	6	2	0	0	0	17	0	0	3	0	2	0	1	0	0	0	0	0	0	0	0	0	0	0	0	0	0	0	0	0	0	0	0	0	0	0	0	0	0
Other corals	0	0	0	0	0	0	0	0	0	0	0	0	0	0	0	0	0	0	0	0	0	0	0	0	0	0	0	0	0	0	0	0	1	1	0	0	0	0	0	0	0	0	0	0	0	0	0	0	0
[truncated: 7 more columns]
