# Supplementary material for: Spatial distribution and feeding substrate of butterflyfishes (family Chaetodontidae) on an Okinawan coral reef
Source: PeerJ. 2020 Aug 4;8:e9666. doi: 10.7717/peerj.9666 (PMC7413084; doi:10.7717/peerj.9666)
Supplement: Supplemental Information 12 [file peerj-08-9666-s012.xlsx]

## Sheet: C. baronessa
	Sample 1	Sample 2	Sample 3	Sample 4	Sample 5	Sample 6	Sample 7	Sample 8	Sample 9	Sample 10	Sample 11	Sample 12	Sample 13	Sample 14	Sample 15	Sample 16	Sample 17	Sample 18	Sample 19	Sample 20	Sample 21	Sample 22	Sample 23	Sample 24	Sample 25	Sample 26
Branching corals	-0.0022	-0.0022	-0.0594364	-0.0012	0.0132928	-0.0012	-0.0012	-0.0012	-0.0012	0.59299	0.145391	-0.0958	-0.0134	-0.0134	-0.0134	-0.0134	-0.0134	-0.0134	-0.0134	0.0424545	-0.003	0.0879091	-0.0432	-0.0432	-0.0432	-0.012
Pocillopora	-0.0012	-0.0012	-0.0156	0.688629	0.122635	0.365533	0.346046	0.4297	0.202726	0.012987	0.116279	0.160224	-0.0052	-0.0052	-0.0052	-0.0052	-0.0052	-0.0052	-0.0052	-0.0056	-0.0056	-0.0056	-0.0038	-0.0038	-0.0038	-0.0048
Branching Acropora	0	0	-0.1148	-0.0172286	0.0741275	-0.0174667	-0.0400308	0.08545	-0.0708	0.0314701	0.413228	-0.1148	-0.0002	0.137731	-0.0002	-0.0002	-0.0002	-0.0002	0.0664667	0.680418	0.314389	0.180418	-0.0076	-0.0076	-0.0076	0.124748
Bottlebrush Acropora	0	0	-0.0134	-0.0074	0.0215855	-0.0074	-0.0074	-0.0074	-0.0074	-0.033226	-0.0592	-0.0134	0	0	0	0	0	0	0	0	0	0	-0.001	-0.001	-0.001	-0.0094
Corymbose Acropora	0.172218	-0.0096	0.130436	0.114257	0.522125	0.2514	0.186785	0.25265	0.497716	0.020374	-0.0056	0.120646	0.09115	-0.0026	-0.0026	-0.0026	-0.0026	-0.0026	-0.0026	-0.0212	-0.0212	-0.0212	0.290118	-0.004	-0.004	0.667941
Coral rubble	-0.101	-0.101	-0.021	-0.2722	-0.2722	-0.2722	-0.2722	-0.2722	-0.2722	-0.1382	-0.1382	-0.021	-0.0742	-0.0742	-0.0742	-0.0742	-0.0742	-0.0742	-0.0742	-0.2638	-0.2638	-0.2638	-0.005	-0.005	-0.005	-0.3626
Dead corals	-0.0366	-0.0366	-0.1092	-0.011	-0.011	-0.011	-0.011	-0.011	-0.011	-0.5492	-0.5492	-0.1092	-0.1042	-0.1042	-0.1042	-0.1042	-0.1042	-0.1042	-0.1042	-0.1232	-0.1232	-0.1232	-0.0848	-0.0848	-0.0848	-0.0108
Encrusting corals	0.173824	0.0124811	-0.0688	-0.00447143	0.0155855	0.133267	0.0481385	0.033475	0.00414386	-0.0022	-0.0022	-0.0688	-0.0988	-0.0988	0.0375636	-0.0988	-0.0988	-0.0988	0.0345333	0.0797091	0.0414316	-0.0112	-0.0694	-0.0694	0.147991	-0.0234
Mushroom corals	-0.0012	-0.0012	-0.0004	0	0	0	0	0	0	-0.0274	-0.0274	-0.0004	-0.002	-0.002	-0.002	-0.002	-0.002	-0.002	-0.002	-0.0002	-0.0002	-0.0002	0	0	0	-0.0006
Leafy corals	-0.0086	-0.0086	-0.009	0	0	0	0	0	0	-0.0318	-0.0318	-0.009	0	0	0	0	0	0	0.0666667	-0.0002	-0.0002	-0.0002	-0.0084	-0.0084	-0.0084	-0.0598
Massive corals	0.464048	0.519741	0.420945	-0.0137429	0.026371	0.101733	-0.0316	0.046525	0.0736632	0.193205	0.207702	0.493873	0.86325	0.819069	0.820636	0.839353	0.957	0.891783	0.690333	0.115964	0.295389	0.161418	0.569459	0.850971	0.487617	0.0783111
Rock	-0.7116	-0.7116	-0.418	-0.4344	-0.4344	-0.4344	-0.4344	-0.4344	-0.4344	-0.0474	-0.0474	-0.418	-0.6538	-0.6538	-0.6538	-0.6538	-0.6538	-0.632061	-0.6538	-0.5134	-0.5134	-0.5134	-0.6916	-0.6916	-0.6916	-0.33
Sand	-0.0276	-0.0276	0	-0.1028	-0.1028	-0.1028	-0.1028	-0.1028	-0.1028	0	0	0	0	0	0	0	0	0	0	-0.0322	-0.0322	-0.0322	0	0	0	-0.0252
Seaweed	0	0	0	0	0	0	0	0	0	-0.0192	-0.0192	0	0	0	0	0	0	0	0	0	0	0	0	0	0	-0.0048
Soft corals	-0.0084	-0.0084	-0.0154	0	0	0	0	0	0	-0.0022	-0.0022	-0.0154	-0.001	-0.001	-0.001	0.0578235	-0.001	-0.001	-0.001	0	0	0	-0.001	-0.001	-0.001	0
Tabular corals	0.0883091	0.375778	0.293655	0.0713571	0.0344783	0.00433333	0.329462	-0.009	0.131351	-0.0002	-0.0002	0.0910571	-0.0016	-0.0016	-0.0016	-0.0016	-0.0016	0.0418783	-0.0016	0.0414545	0.311789	0.541455	0.0584235	0.0710286	0.216991	-0.0274
Other corals	0	0	0	-0.0098	-0.0098	-0.0098	-0.0098	-0.0098	-0.0098	0	0	0	0	0	0	0.0588235	0	0	0	-0.0002	-0.0002	-0.0002	-0.0022	-0.0022	-0.0022	-0.0002

## Sheet: C. bennetti
	Sample 1	Sample 2	Sample 3	Sample 4	Sample 5	Sample 6	Sample 7	Sample 8	Sample 9	Sample 10	Sample 11	Sample 12	Sample 13	Sample 14	Sample 15	Sample 16	Sample 17	Sample 18	Sample 19	Sample 20	Sample 21	Sample 22
Branching corals	-0.0134	-0.0022	-0.0022	0.0533556	-0.0168	-0.0174	0.0120571	0.829984	0.0679111	-0.0432	-0.0348	-0.00254194	-0.0432	-0.0432	0.0568	-0.0012	-0.0538	-0.053	-0.053	-0.053	-0.022697	-0.053
Pocillopora	-0.0052	0.0554038	-0.0012	-0.0012	-0.0086	0	0	0	-0.0038	-0.0038	-0.0002	-0.0002	0.0751474	-0.0038	-0.0038	0	-0.0346	-0.0194	-0.0194	0.0163143	-0.0194	-0.0194
Branching Acropora	-0.0002	0	0	0	-0.031	-0.0984	-0.0146	-0.0146	-0.0076	-0.0076	-0.0204	-0.0204	-0.0076	-0.0076	-0.0076	0	-0.04	-0.047	-0.047	-0.047	-0.047	-0.047
Bottlebrush Acropora	0	0	0	0	-0.0002	-0.011581	-0.0052	-0.0052	-0.001	-0.001	-0.0016	-0.0016	-0.001	-0.001	-0.001	0	-0.0006	-0.0008	-0.0008	-0.0008	-0.0008	-0.0008
Corymbose Acropora	-0.0026	-0.0096	-0.0096	-0.0096	-0.0066	-0.0056	-0.0016	-0.0016	-0.004	-0.004	-0.0036	-0.0036	-0.004	-0.004	-0.004	-0.0016	-0.0284	-0.0208	-0.0208	-0.0208	-0.0208	-0.0208
Coral rubble	-0.0742	-0.101	-0.101	-0.101	-0.0258	-0.1382	-0.274	-0.274	-0.005	-0.005	-0.0866	-0.0866	-0.005	-0.005	-0.005	-0.085	-0.0228	-0.06	-0.06	-0.06	-0.06	-0.06
Dead corals	-0.1042	-0.0366	-0.0366	-0.0366	-0.1762	-0.5492	-0.2066	-0.2066	-0.0848	-0.0848	-0.0694	-0.0694	-0.0848	-0.0848	-0.0848	-0.1314	-0.1084	-0.0924	-0.0924	-0.0924	-0.0924	-0.0924
Encrusting corals	0.866112	0.0257396	0.9314	0.6814	0.7798	0.545419	0.855343	-0.0018	0.0417111	-0.0694	0.373104	0.0785742	0.0621789	0.297267	-0.0194	0.0713231	0.0635263	0.169114	-0.0213619	0.704829	-0.086297	-0.0749333
Mushroom corals	-0.002	-0.0012	-0.0012	-0.0012	-0.0006	-0.0274	-0.0018	0.0374157	0	0	0	0	0	0	0	0	-0.0004	-0.0008	-0.0008	-0.0008	-0.0008	-0.0008
Leafy corals	0	0.368758	-0.0086	-0.0086	-0.002	0.325343	0	0	-0.0084	0.355236	0.434783	0.0967742	0.0705474	-0.0084	-0.0084	0	-0.0034	-0.0118	-0.0118	-0.0118	-0.0118	-0.0118
Massive corals	-0.00791228	0.450898	-0.0208	0.0625333	0.041	0.046019	-0.0132	-0.0132	0.514993	0.331491	0.0295565	0.458729	0.632926	0.555733	0.5724	0.907077	0.721474	0.534429	0.867762	0.105857	0.902394	0.921333
Rock	-0.6538	-0.7116	-0.7116	-0.7116	-0.5052	-0.0474	-0.1494	-0.1494	-0.6916	-0.464327	-0.574443	-0.403335	-0.6916	-0.6916	-0.6916	-0.7074	-0.4356	-0.4722	-0.4722	-0.4722	-0.4722	-0.4722
Sand	0	-0.0276	-0.0276	-0.0276	0	0	-0.1392	-0.1392	0	0	-0.038	-0.038	0	0	0	-0.0282	0	0	0	0	0	0
Seaweed	0	0	0	0	0	-0.0192	-0.0094	-0.0094	0	0	0	0	0	0	0	-0.005	-0.0016	0	0	0	0	0
Soft corals	-0.001	-0.0084	-0.0084	0.102711	-0.033	-0.0022	-0.021	-0.021	-0.001	-0.001	-0.004	-0.004	-0.001	-0.001	0.199	-0.0178	-0.015	-0.015	-0.015	-0.015	-0.015	-0.015
Tabular corals	-0.0016	-0.0026	-0.0026	-0.0026	-0.0148	-0.0002	-0.019	-0.019	-0.0004	-0.0004	-0.001	-0.001	-0.0004	-0.0004	-0.0004	0	-0.0394	-0.0532	-0.0532	-0.0532	-0.0532	-0.0532
Other corals	0	0	0	0	0	0	-0.0124	-0.0124	0.182985	-0.0022	-0.0034	-0.0034	-0.0022	-0.0022	-0.0022	-0.0008	-0.001	0.142857	0	0	0	0

## Sheet: C. lunulatus
	Sample 1	Sample 2	Sample 3	Sample 4	Sample 5	Sample 6	Sample 7	Sample 8	Sample 9	Sample 10	Sample 11	Sample 12	Sample 13	Sample 14	Sample 15	Sample 16	Sample 17	Sample 18	Sample 19	Sample 20	Sample 21	Sample 22	Sample 23	Sample 24	Sample 25	Sample 26	Sample 27	Sample 28
Branching corals	-0.0958	-0.0958	-0.0840353	-0.0958	-0.0168	-0.0168	-0.0168	-0.0168	-0.053	-0.053	-0.0286098	-0.053	-0.053	-0.00215254	-0.0022	-0.0022	-0.0022	-0.003	-0.003	0.0178333	-0.0174	-0.0174	-0.0174	-0.0174	-0.0012	-0.037497	0.1822	0.316815
Pocillopora	0.0236157	-0.0156	-0.0156	-0.0156	-0.0086	-0.0086	0.129331	-0.0086	-0.0194	-0.0194	-0.0194	0.101812	-0.0194	0.0144983	-0.0012	-0.0012	-0.0012	-0.0056	-0.0056	-0.0056	0	0	0	0	0.336462	0	0	0
Branching Acropora	-0.1148	-0.1148	0.0969647	-0.067925	0.00025	0.00196703	-0.031	-0.031	-0.047	-0.047	-0.047	0.0136061	-0.047	-0.047	0	0	0	-0.0014	-0.0014	-0.0014	-0.0984	-0.0984	0.0525434	0.0216	-0.0708	0.00430303	0.00971429	0.0252821
Bottlebrush Acropora	-0.0134	-0.0134	0.280718	0.033475	-0.0002	-0.0002	-0.0002	-0.0002	-0.0008	-0.0008	-0.0008	-0.0008	-0.0008	-0.0008	0	0	0	0	0	0	-0.00364444	0.0277565	-0.0403321	0.3408	-0.0074	-0.0048	-0.0048	-0.0048
Corymbose Acropora	-0.0332	0.0102783	-0.0332	-0.0332	-0.0066	-0.0066	-0.0066	-0.0066	0.0701091	-0.0208	0.0279805	-0.0208	-0.0208	-0.0208	0.103303	-0.0096	-0.0096	-0.0212	-0.0212	0.1038	-0.0056	0.211791	-0.0056	-0.0056	0.266482	0.175921	0.303086	0.0920051
Coral rubble	-0.021	-0.021	-0.021	-0.021	-0.0258	-0.0258	-0.0258	-0.0258	-0.06	-0.06	-0.06	-0.06	-0.06	-0.06	-0.101	-0.101	-0.101	-0.2638	-0.2638	-0.2638	-0.1382	-0.1382	-0.1382	-0.1382	-0.2722	-0.448	-0.448	-0.448
Dead corals	-0.1092	-0.1092	-0.1092	-0.1092	-0.1762	-0.1762	-0.1762	-0.1762	-0.0924	-0.0924	-0.0924	-0.0924	-0.0924	-0.0924	-0.0366	-0.0366	-0.0366	-0.1232	-0.1232	-0.1232	-0.5492	-0.462243	-0.5492	-0.5492	-0.011	-0.0208	-0.0208	-0.0208
Encrusting corals	0.225318	0.394968	0.354729	0.665575	0.000425	-0.096244	0.23911	0.0740857	0.410673	0.277339	0.200473	0.337945	0.629163	0.0698407	0.576561	-0.0145459	0.769635	0.4888	0.0375805	0.3013	0.136689	0.389104	0.318555	0.3178	0.199715	0.228024	0.271314	0.293292
Mushroom corals	-0.0004	-0.0004	-0.0004	-0.0004	-0.0006	-0.0006	-0.0006	-0.0006	-0.0008	-0.0008	-0.0008	-0.0008	-0.0008	-0.0008	0.143961	-0.0012	-0.0012	-0.0002	-0.0002	-0.0002	0.361489	0.189991	0.42543	0.1326	0	-0.001	-0.001	-0.001
Leafy corals	-0.009	-0.009	-0.009	-0.009	-0.002	-0.002	-0.002	-0.002	-0.0118	-0.0118	-0.0118	-0.0118	-0.0118	0.479725	-0.0086	-0.0086	-0.0086	-0.0002	-0.0002	-0.0002	-0.0318	-0.0318	-0.0318	-0.0318	0	0	0	0
Massive corals	0.41738	0.0968348	-0.0336	0.138275	0.789125	0.884077	0.443759	0.603857	0.272091	0.26603	0.255683	0.316535	0.0307966	0.183339	0.0759742	0.925146	0.126259	-0.0204	0.93082	0.1046	0.192844	-0.0016	0.0550038	-0.0016	0.0831541	0.453648	0.0402286	0.0713641
Rock	-0.418	-0.418	-0.418	-0.418	-0.5052	-0.5052	-0.5052	-0.48139	-0.4722	-0.4722	-0.4722	-0.4722	-0.4722	-0.4722	-0.7116	-0.7116	-0.7116	-0.5134	-0.5134	-0.5134	-0.0474	-0.0474	-0.0474	-0.0474	-0.418007	-0.3098	-0.3098	-0.3098
Sand	0	0	0	0	0	0	0	0	0	0	0	0	0	0	-0.0276	-0.0276	-0.0276	-0.0322	-0.0322	-0.0322	0	0	0	0	-0.1028	-0.0088	-0.0088	-0.0088
Seaweed	0	0	0	0	0	0	0	0	0	0	0	0	0	0	0	0	0	0	0	0	-0.0192	-0.0192	-0.0192	-0.0192	0	0	0	0
Soft corals	-0.0154	-0.0154	-0.0154	-0.0154	-0.033	-0.033	-0.033	-0.033	-0.015	-0.015	-0.015	-0.015	-0.015	-0.015	-0.0084	-0.0084	-0.0084	0	0	0	-0.0022	-0.0022	-0.0022	-0.0022	0	-0.002	-0.002	-0.002
Tabular corals	0.00702353	0.310519	0.00702353	-0.0518	-0.0148	-0.0148	-0.0148	-0.0148	0.0195273	0.158921	0.117532	-0.043099	0.133241	-0.0532	-0.0026	-0.0026	0.0121059	0.496	-0.004	0.412667	0.222022	-0.0002	-0.0002	-0.0002	0.00739344	-0.0184	-0.000542857	0.00724103
Other corals	0.156863	0	0	0	0	0	0	0.119048	0	0.0909091	0.146341	0	0	0.0169492	0	0	0	-0.0002	-0.0002	-0.0002	0	0	0	0	-0.0098	-0.0108	-0.0108	-0.0108

## Sheet: C. ornatissimus
	Sample 1	Sample 2	Sample 3	Sample 4	Sample 5	Sample 6	Sample 7	Sample 8	Sample 9	Sample 10	Sample 11	Sample 12	Sample 13	Sample 14	Sample 15	Sample 16	Sample 17	Sample 18	Sample 19	Sample 20	Sample 21	Sample 22	Sample 23
Branching corals	-0.0300105	-0.00489091	-0.0958	-0.0168	-0.0022	-0.0022	-0.0538	-0.0088	-0.0088	-0.0678	0.242424	0	-0.0012	-0.0012	-0.0538	-0.0538	-0.0538	-0.0538	-0.053	0.0379091	-0.0102	-0.0102	-0.0046
Pocillopora	-0.0156	0.00712727	-0.0156	-0.0086	-0.0012	-0.0012	0.1654	-0.008	-0.008	0	-0.0036	0.237141	0.125533	-0.0078	0.324775	0.0166821	0.0467953	-0.0346	-0.0194	-0.0194	0.031561	0.0523015	-0.016
Branching Acropora	-0.0621684	-0.1148	-0.1148	-0.031	0	0	0.420606	0	0	0.462889	0	0	-0.0708	0.038575	-0.04	-0.04	-0.04	-0.04	-0.047	-0.047	-0.0186	-0.0186	-0.0236
Bottlebrush Acropora	-0.0134	-0.0134	-0.0134	-0.0002	0	0	-0.0006	0	0	-0.0048	0	0	-0.0074	-0.0074	-0.0006	-0.0006	-0.0006	-0.0006	-0.0008	-0.0008	0	0	0
Corymbose Acropora	0.0194316	0.125891	0.124695	0.1334	0.266996	-0.0096	-0.0284	-0.0002	-0.0002	0.274911	-0.0052	-0.0052	0.238067	0.00265	0.3466	0.330574	0.425088	0.304933	0.253173	-0.0208	0.622473	0.70117	0.1748
Coral rubble	-0.021	-0.021	-0.021	-0.0258	-0.101	-0.101	-0.0228	-0.026	-0.026	-0.448	0	0	-0.2722	-0.2722	-0.0228	-0.0228	-0.0228	-0.0228	-0.06	-0.06	0	0	0
Dead corals	-0.1092	-0.1092	-0.1092	-0.1762	-0.0366	-0.0366	-0.1084	-0.0916	-0.0916	-0.0208	-0.0128	-0.0128	-0.011	-0.011	-0.1084	-0.1084	-0.1084	-0.1084	-0.0924	-0.0924	-0.0458	-0.0458	-0.0442
Encrusting corals	0.668042	-0.0233455	0.0890947	0.6998	0.505868	0.350005	-0.134879	0.162863	0.8076	0.1856	0.544358	0.246378	0.119933	0.45535	0.024875	0.160692	0.178581	0.314538	0.349153	0.519764	-0.0156	-0.0156	0.6723
Mushroom corals	-0.0004	-0.0004	-0.0004	-0.0006	-0.0012	-0.0012	-0.0004	-0.0016	-0.0016	-0.001	-0.0002	-0.0002	0	0	-0.0004	-0.0004	-0.0004	-0.0004	-0.0008	-0.0008	0	0	0
Leafy corals	-0.009	-0.009	-0.009	-0.002	-0.0086	0.572795	-0.0034	-0.0162	-0.0162	0	-0.0002	-0.0002	0	0	-0.0034	-0.0034	-0.0034	-0.0034	-0.0118	-0.0118	0	0	0
Massive corals	0.0585053	0.648218	0.176926	-0.019	0.128136	-0.0208	-0.068	0.587137	-0.0576	-0.0312	0.159018	0.366089	0.435067	0.077775	-0.068	-0.068	-0.068	0.0858462	-0.037	0.0993636	-0.0034	-0.0034	-0.0052
Rock	-0.418	-0.418	-0.102211	-0.5052	-0.7116	-0.7116	-0.4356	-0.58	-0.58	-0.3098	-0.8986	-0.8986	-0.4344	-0.4344	-0.4356	-0.4356	-0.4356	-0.4356	-0.4722	-0.4722	-0.691	-0.691	-0.743
Sand	0	0	0	0	-0.0276	-0.0276	0	0	0	-0.0088	0	0	-0.1028	-0.1028	0	0	0	0	0	0	0	0	0
Seaweed	0	0	0	0	0	0	-0.0016	-0.0042	-0.0042	0	-0.0004	-0.0004	0	0	-0.0016	-0.0016	-0.0016	-0.0016	0	0	0	0	0
Soft corals	-0.0154	-0.0154	-0.0154	-0.033	-0.0084	-0.0084	-0.015	-0.0036	-0.0036	-0.002	-0.003	-0.003	0	0	-0.015	-0.015	-0.015	-0.015	-0.015	-0.015	-0.0186	-0.0186	-0.0188
Tabular corals	-0.0518	-0.0518	0.106095	-0.0148	-0.0026	-0.0026	0.287873	-0.0092	-0.0092	-0.0184	0	0	-0.009	0.27225	0.05435	0.242651	0.100135	0.0118821	0.207074	0.0831636	0.151166	0.0517284	0.0083
Other corals	0	0	0	0	0	0	-0.001	-0.0006	-0.0006	-0.0108	-0.0218	0.0707926	-0.0098	-0.0098	-0.001	-0.001	-0.001	-0.001	0	0	-0.002	-0.002	0

## Sheet: C. plebeius
	Sample 1	Sample 2	Sample 3	Sample 4	Sample 5	Sample 6	Sample 7	Sample 8	Sample 9	Sample 10	Sample 11	Sample 12	Sample 13	Sample 14	Sample 15	Sample 16	Sample 17	Sample 18	Sample 19	Sample 20	Sample 21	Sample 22
Branching corals	-0.0134	-0.0174	-0.0958	-0.0168	-0.0168	-0.053	-0.053	-0.053	-0.053	-0.003	0.0208095	0.255065	-0.0022	-0.0022	-0.0022	-0.0538	-0.0088	0.128459	-0.0923385	-0.0538769	-0.1308	-0.012
Pocillopora	-0.0052	0	0.2344	-0.0086	-0.0086	-0.0194	0.116964	-0.0194	-0.0194	0.292272	-0.0056	-0.0056	-0.0012	-0.0012	-0.0012	-0.0346	-0.008	0	0	0	0	0.0229778
Branching Acropora	-0.0002	0.00686316	-0.1148	-0.031	-0.031	-0.047	-0.047	-0.047	-0.047	0.0198766	0.046219	0.15989	0	0	0	0.567143	0	-0.0146	-0.0146	-0.0146	-0.0146	0.00437778
Bottlebrush Acropora	0	-0.0592	-0.0134	-0.0002	-0.0002	-0.0008	-0.0008	-0.0008	-0.0008	0	0	0	0	0	0	-0.0006	0	-0.0052	-0.0052	-0.0052	-0.0052	-0.0094
Corymbose Acropora	-0.0026	-0.0056	-0.0332	-0.0066	-0.0066	-0.0208	-0.0208	0.0903111	-0.0208	0.276672	-0.0212	-0.0212	0.0737333	-0.0096	-0.0096	-0.0284	-0.0002	-0.0016	-0.0016	-0.0016	-0.0016	0.6772
Coral rubble	-0.0742	-0.1382	-0.021	-0.0258	-0.0258	-0.06	-0.06	-0.06	-0.06	-0.2638	-0.2638	-0.2638	-0.101	-0.101	-0.101	-0.0228	-0.026	-0.274	-0.274	-0.274	-0.274	-0.3626
Dead corals	-0.1042	-0.5492	-0.1092	-0.1762	-0.1262	-0.0924	-0.0924	-0.0924	-0.0924	-0.1232	-0.1232	-0.1232	-0.0366	-0.0366	-0.0366	-0.1084	-0.0916	-0.0954889	-0.2066	-0.2066	-0.2066	-0.0108
Encrusting corals	0.256039	-0.0022	0.4312	0.6098	0.7098	0.850067	0.701582	0.6334	0.591733	0.11646	0.298324	0.182348	0.0564	0.615611	0.295036	0.103	0.50457	-0.0018	-0.0018	-0.0018	-0.0018	-0.0234
Mushroom corals	-0.002	-0.0274	-0.0004	-0.0006	-0.0006	-0.0008	-0.0008	-0.0008	-0.0008	-0.0002	-0.0002	-0.0002	-0.0012	-0.0012	-0.0012	0.0710286	-0.0016	0.294496	-0.0018	-0.0018	-0.0018	-0.0006
Leafy corals	0.16129	0.599779	-0.009	-0.002	-0.002	-0.0118	-0.0118	-0.0118	-0.0118	-0.0002	-0.0002	0.0320581	0.158067	0.254558	0.445945	-0.0034	-0.0162	0	0.769231	0	0	-0.0598
Massive corals	0.440871	0.261558	0.0914	0.211	0.061	-0.00366667	0.00845455	0.101889	0.254667	0.234919	0.551029	0.302181	0.562533	0.0318316	0.161018	0.00342857	0.24543	0.320133	0.0252615	-0.0132	0.1868	0.0227556
Rock	-0.6538	-0.0474	-0.293	-0.5052	-0.5052	-0.4722	-0.4722	-0.4722	-0.4722	-0.5134	-0.5134	-0.481142	-0.7116	-0.7116	-0.7116	-0.4356	-0.58	-0.1494	-0.0724769	0.773677	0.6506	-0.33
Sand	0	0	0	0	0	0	0	0	0	-0.0322	-0.0322	-0.0322	-0.0276	-0.0276	-0.0276	0	0	-0.1392	-0.1392	-0.1392	-0.1392	-0.0252
Seaweed	0	-0.0192	0	0	0	0	0	0	0	0	0	0	0	0	0	-0.0016	-0.0042	-0.0094	-0.0094	-0.0094	-0.0094	-0.0048
Soft corals	-0.001	-0.0022	-0.0154	-0.033	-0.033	-0.015	-0.015	-0.015	-0.015	0	0	0	-0.0084	-0.0084	-0.0084	-0.015	-0.0036	-0.021	-0.021	-0.021	-0.021	0
Tabular corals	-0.0016	-0.0002	-0.0518	-0.0148	-0.0148	-0.0532	-0.0532	-0.0532	-0.0532	-0.004	0.043619	-0.004	-0.0026	-0.0026	-0.0026	-0.0394	-0.0092	-0.019	0.0579231	-0.019	-0.019	0.111489
Other corals	0	0	0	0	0	0	0	0	0	-0.0002	-0.0002	-0.0002	0.0416667	0	0	-0.001	-0.0006	-0.0124	-0.0124	-0.0124	-0.0124	-0.0002

## Sheet: C. punctatofasciatus
	Sample 1	Sample 2	Sample 3	Sample 4	Sample 5	Sample 6	Sample 7	Sample 8	Sample 9	Sample 10	Sample 11	Sample 12	Sample 13	Sample 14	Sample 15	Sample 16	Sample 17	Sample 18	Sample 19	Sample 20	Sample 21	Sample 22
Branching corals	0.0176286	-0.0538	-0.0538	-0.0538	-0.0538	-0.0538	-0.0538	-0.0088	0	0	0	0	0	0	0.125	0	0	-0.053	0	-0.0046	-0.0046	-0.0046
Pocillopora	0.0654	0.0242235	-0.0346	-0.0346	-0.0346	0.0171241	-0.0346	-0.008	-0.0036	-0.0036	-0.0036	-0.0036	-0.0036	-0.0036	-0.0036	-0.0036	-0.0036	0.10129	-0.0288	0.0184828	0.350667	0.168211
Branching Acropora	-0.04	-0.04	-0.04	-0.04	-0.00296296	0.0117241	0.0790476	0	0	0	0	0	0	0	0	0	0	0.090931	-0.0002	-0.0236	-0.0236	-0.0236
Bottlebrush Acropora	-0.0006	-0.0006	0.0827333	-0.0006	-0.0006	-0.0006	-0.0006	0	0	0	0	0	0	0	0	0	0	-0.0008	0	0	0	0
Corymbose Acropora	0.157314	-0.0284	0.0132667	-0.0284	0.0827111	0.0922897	0.0668381	-0.0002	-0.0052	0.1948	0.176618	0.0536235	-0.0052	0.0536235	-0.0052	-0.0052	-0.0052	-0.0208	0.1976	0.442041	0.4248	0.161642
Coral rubble	-0.0228	-0.0228	-0.0228	-0.0228	-0.0228	-0.0228	-0.0228	-0.026	0	0	0	0	0	0	0	0	0	-0.06	0	0	0	0
Dead corals	-0.1084	-0.1084	-0.1084	-0.1084	-0.1084	-0.1084	-0.1084	-0.0916	-0.0128	-0.0128	-0.0128	0.0460235	0.0104558	-0.0128	-0.0128	0.0084766	-0.0128	-0.0924	-0.0062	-0.0442	-0.0442	-0.0442
Encrusting corals	0.153	0.220647	0.332167	0.334481	0.149296	0.370241	0.233952	0.740933	0.0638381	0.5686	0.604964	0.498012	0.340693	0.439188	0.3436	0.500515	0.670354	-0.0648759	0.6128	0.0537655	0.0514667	0.405853
Mushroom corals	-0.0004	-0.0004	-0.0004	-0.0004	-0.0004	-0.0004	-0.0004	-0.0016	-0.0002	-0.0002	-0.0002	-0.0002	-0.0002	-0.0002	-0.0002	-0.0002	-0.0002	-0.0008	0	0	0	0
Leafy corals	-0.0034	-0.0034	-0.0034	-0.0034	-0.0034	-0.0034	-0.0034	-0.0162	-0.0002	-0.0002	-0.0002	-0.0002	-0.0002	-0.0002	-0.0002	-0.0002	-0.0002	-0.0118	0	0	0	0
Massive corals	0.274857	0.446706	0.182	0.30237	0.487556	0.121655	0.217714	0.00906667	0.858152	0.110533	0.159018	0.153671	0.442316	0.212494	0.4772	0.168689	0.222814	0.204379	0.1082	-0.0052	-0.0052	-0.0052
Rock	-0.4356	-0.4356	-0.393933	-0.4356	-0.4356	-0.418359	-0.4356	-0.58	-0.8986	-0.831933	-0.8986	-0.722129	-0.805577	-0.663306	-0.8986	-0.643281	-0.845968	-0.4722	-0.8828	-0.743	-0.743	-0.716684
Sand	0	0	0	0	0	0	0	0	0	0	0	0	0	0	0	0	0	0	0	0	0	0
Seaweed	-0.0016	-0.0016	-0.0016	-0.0016	-0.0016	-0.0016	-0.0016	-0.0042	-0.0004	-0.0004	-0.0004	-0.0004	-0.0004	-0.0004	-0.0004	-0.0004	-0.0004	0	0	0	0	0
Soft corals	-0.015	-0.015	-0.015	-0.015	-0.015	-0.015	-0.015	-0.0036	-0.003	-0.003	-0.003	-0.003	-0.003	-0.003	-0.003	-0.003	-0.003	-0.015	-0.0002	-0.0188	-0.0188	-0.0188
Tabular corals	-0.0394	0.0194235	0.0647667	0.108748	-0.0394	0.0123241	0.0796476	-0.0092	0	0	0	0	0	0	0	0	0	0.395076	-0.0002	0.32511	0.0124667	0.0773789
Other corals	-0.001	-0.001	-0.001	-0.001	-0.001	-0.001	-0.001	-0.0006	0.00200952	-0.0218	-0.0218	-0.0218	0.0247116	-0.0218	-0.0218	-0.0218	-0.0218	0	-0.0002	0	0	0

## Sheet: C. trifascialis
	Sample 1	Sample 2	Sample 3	Sample 4	Sample 5	Sample 6	Sample 7	Sample 8	Sample 9	Sample 10	Sample 11	Sample 12	Sample 13	Sample 14	Sample 15	Sample 16	Sample 17	Sample 18	Sample 19	Sample 20	Sample 21	Sample 22	Sample 23	Sample 24	Sample 25	Sample 26	Sample 27	Sample 28
Branching corals	-0.0012	-0.0012	-0.0012	-0.0174	-0.0174	-0.0958	-0.0958	-0.0958	-0.0168	-0.0168	-0.053	-0.053	-0.053	-0.0678	-0.0678	-0.0678	0	-0.012	-0.012	-0.012	-0.012	-0.012	-0.012	-0.012	-0.0538	-0.0538	-0.0538	-0.0538
Pocillopora	0.0477556	0.018174	-0.0078	0	0	-0.0156	-0.0156	-0.0156	0.120432	0.175073	0.028219	-0.0194	-0.0194	0	0	0	-0.0036	-0.0048	-0.0048	-0.0048	-0.0048	-0.0048	-0.0048	-0.0048	-0.0346	0.0470327	-0.0346	-0.0346
Branching Acropora	0.0217926	0.00712208	0.0292	0.771165	0.4016	0.161062	-0.1148	-0.1148	-0.031	0.00981633	-0.047	-0.047	0.00563158	0.0830909	-0.000683544	-0.00905085	0	0.112964	-0.0234	0.0158157	0.0555474	0.00736923	0.0733742	0.0599333	-0.04	0.0212245	-0.04	0.0266667
Bottlebrush Acropora	-0.0074	-0.0074	0.00688571	-0.0592	-0.0592	-0.0134	-0.0134	-0.0134	-0.0002	-0.0002	-0.0008	-0.0008	-0.0008	0.0133818	-0.0048	-0.0048	0	-0.0094	0.00878182	-0.0094	-0.0094	-0.0094	-0.0094	-0.0094	-0.0006	-0.0006	-0.0006	-0.0006
Corymbose Acropora	0.563993	0.789582	0.528543	0.124835	-0.0056	0.156455	0.871562	0.509657	0.283723	0.76891	0.026819	0.346547	0.689726	0.618345	0.697977	0.489224	-0.0052	0.381745	0.418109	0.574259	0.611411	0.542585	0.572361	0.4272	0.843395	0.583845	0.536116	0.638267
Coral rubble	-0.2722	-0.2722	-0.2722	-0.1382	-0.1382	-0.021	-0.021	-0.021	-0.0258	-0.0258	-0.06	-0.06	-0.06	-0.448	-0.448	-0.448	0	-0.3626	-0.3626	-0.3626	-0.3626	-0.3626	-0.3626	-0.3626	-0.0228	-0.0228	-0.0228	-0.0228
Dead corals	-0.011	-0.011	-0.011	-0.5492	-0.5492	-0.1092	-0.1092	-0.1092	-0.1762	-0.1762	-0.0924	-0.0924	-0.0924	-0.0208	-0.0208	-0.0208	-0.0128	-0.0108	-0.0108	-0.0108	-0.0108	-0.0108	-0.0108	-0.0108	-0.1084	-0.1084	-0.1084	-0.1084
Encrusting corals	0.00511852	-0.0134	-0.0134	-0.0022	-0.0022	-0.0688	-0.0688	-0.0688	-0.1402	-0.1402	-0.1166	-0.1166	-0.1166	-0.0144	0.0362329	0.00254915	-0.0314	-0.0234	-0.0234	-0.0234	-0.0234	-0.0234	-0.0234	-0.0234	-0.147	-0.147	-0.147	-0.147
Mushroom corals	0	0	0	-0.0274	-0.0274	-0.0004	-0.0004	-0.0004	-0.0006	-0.0006	-0.0008	-0.0008	-0.0008	-0.001	-0.001	-0.001	-0.0002	-0.0006	-0.0006	-0.0006	-0.0006	-0.0006	-0.0006	-0.0006	-0.0004	-0.0004	-0.0004	-0.0004
Leafy corals	0	0	0	-0.0318	-0.0318	-0.009	-0.009	-0.009	-0.002	-0.002	-0.0118	-0.0118	-0.0118	0	0	0	-0.0002	-0.0598	-0.0598	-0.0598	-0.0598	-0.0598	-0.0598	-0.0598	-0.0034	-0.0034	-0.0034	-0.0034
Massive corals	-0.0316	-0.0316	-0.0316	-0.0016	0.4984	-0.0336	-0.0336	-0.0336	-0.039	-0.039	-0.037	-0.037	-0.037	-0.0312	-0.00588354	0.0196475	0.9772	-0.0328	0.0217455	-0.0328	-0.0328	-0.0328	0.0317161	0.0505333	-0.068	-0.068	-0.068	-0.068
Rock	-0.4344	-0.4344	-0.4344	-0.0474	-0.0474	-0.418	-0.418	-0.418	-0.5052	-0.5052	-0.4722	-0.4722	-0.4722	-0.3098	-0.3098	-0.3098	-0.8986	-0.33	-0.33	-0.33	-0.33	-0.33	-0.33	-0.33	-0.4356	-0.4356	-0.4356	-0.4356
Sand	-0.1028	-0.1028	-0.1028	0	0	0	0	0	0	0	0	0	0	-0.0088	-0.0088	-0.0088	0	-0.0252	-0.0252	-0.0252	-0.0252	-0.0252	-0.0252	-0.0252	0	0	0	0
Seaweed	0	0	0	-0.0192	-0.0192	0	0	0	0	0	0	0	0	0	0	0	-0.0004	-0.0048	-0.0048	-0.0048	-0.0048	-0.0048	-0.0048	-0.0048	-0.0016	-0.0016	-0.0016	-0.0016
Soft corals	0	0	0	-0.0022	-0.0022	-0.0154	-0.0154	-0.0154	-0.033	-0.033	-0.015	-0.015	-0.015	-0.002	-0.002	-0.002	-0.003	0	0	0	0	0	0	0	-0.015	-0.015	-0.015	-0.015
Tabular corals	0.231741	0.0689221	0.319571	-0.0002	-0.0002	0.482683	0.0434381	0.405343	0.565845	-0.0148	0.851562	0.579453	0.183642	0.199782	0.146157	0.371431	0	0.381691	0.408964	0.286325	0.209442	0.326446	0.166148	0.305933	0.0888051	0.205498	0.396084	0.227267
Other corals	-0.0098	-0.0098	-0.0098	0	0	0	0	0	0	0	0	0	0	-0.0108	-0.0108	-0.0108	-0.0218	-0.0002	-0.0002	-0.0002	-0.0002	-0.0002	-0.0002	-0.0002	-0.001	-0.001	-0.001	-0.001
