# Supplementary material for: Spatial distribution and feeding substrate of butterflyfishes (family Chaetodontidae) on an Okinawan coral reef
Source: PeerJ. 2020 Aug 4;8:e9666. doi: 10.7717/peerj.9666 (PMC7413084; doi:10.7717/peerj.9666)
Supplement: Supplemental Information 13 [file peerj-08-9666-s013.xlsx]

## Sheet: C. argentatus
	Sample 1	Sample 2	Sample 3	Sample 4	Sample 5	Sample 6	Sample 7	Sample 8	Sample 9	Sample 10	Sample 11	Sample 12	Sample 13	Sample 14	Sample 15	Sample 16
Branching corals	-0.0168	-0.003	-0.0134	-0.003	-0.003	-0.003	-0.0022	-0.0022	-0.0088	-0.0002	-0.0002	-0.0002	-0.0002	-0.0002	-0.012	-0.0012
Pocillopora	-0.0086	0.0777333	-0.0052	-0.0056	-0.0056	-0.0056	-0.0012	0.035837	-0.008	-0.004	-0.004	-0.004	-0.004	-0.004	-0.0048	0
Branching Acropora	-0.031	-0.0014	-0.0002	-0.0014	-0.0014	0.271327	0	0	0	-0.001	-0.001	-0.001	-0.001	-0.001	-0.0234	0
Bottlebrush Acropora	-0.0002	0	0	0	0	0	0	0	0	0	0	0	0	0	-0.0094	0
Corymbose Acropora	-0.0066	-0.0212	-0.0026	-0.0212	0.0413	-0.0212	-0.0096	-0.0096	-0.0002	0.029837	-0.0072	-0.0072	0.0261333	0.103911	0.195057	-0.0016
Coral rubble	-0.0258	-0.2638	-0.0307217	0.0695333	-0.180467	-0.0819818	0.0622653	-0.101	-0.026	0	0	0	0	0	-0.3626	-0.085
Dead corals	-0.1762	0.543467	-0.1042	-0.0565333	-0.1232	0.240436	-0.0366	0.0374741	-0.0916	-0.0406	-0.0406	-0.0406	-0.0406	-0.0406	-0.0108	-0.1314
Encrusting corals	0.0820222	-0.0112	0.292504	0.455467	0.197133	0.0342545	-0.0686	-0.0686	-0.0257333	0.302933	0.0465231	0.175482	0.136267	-0.0304	-0.0234	0.0944
Mushroom corals	-0.0006	-0.0002	-0.002	-0.0002	-0.0002	-0.0002	0.0192082	-0.0012	-0.0016	0	0	0	0	0	-0.0006	0
Leafy corals	-0.002	-0.0002	0	-0.0002	-0.0002	-0.0002	-0.0086	0.028437	-0.0162	-0.0012	-0.0012	-0.0012	-0.0012	-0.0012	-0.0598	0
Massive corals	-0.039	0.0629333	-0.043	-0.0204	0.271267	-0.0204	0.0608327	0.386607	-0.0576	0.0761926	-0.0164	0.0718353	-0.0164	0.0391556	0.127914	0.284
Rock	0.272578	-0.430067	-0.0885826	-0.5134	-0.346733	-0.377036	0.0230939	-0.267156	0.253333	-0.354563	0.0314769	-0.185718	-0.0916	-0.0582667	0.241429	-0.1074
Sand	0	-0.0322	0	-0.0322	-0.0322	-0.0322	-0.0276	-0.0276	0	0	0	0	0	0	-0.0252	-0.0282
Seaweed	0	0	0	0	0	0	0	0	-0.0042	0	0	0	0	0	-0.0048	-0.005
Soft corals	-0.033	0	-0.001	0	0	0	-0.0084	-0.0084	-0.0036	-0.0032	-0.0032	-0.0032	-0.0032	-0.0032	0	-0.0178
Tabular corals	-0.0148	0.0793333	-0.0016	0.129333	0.162667	-0.004	-0.0026	-0.0026	-0.0092	0	0	0	0	0	-0.0274	0
Other corals	0	-0.0002	0	-0.0002	0.0206333	-0.0002	0	0	-0.0006	-0.0042	-0.0042	-0.0042	-0.0042	-0.0042	-0.0002	-0.0008

## Sheet: C. auriga
	Sample 1	Sample 2	Sample 3	Sample 4	Sample 5	Sample 6	Sample 7	Sample 8	Sample 9
Branching corals	0.272314	-0.053	-0.053	-0.003	-0.003	-0.0012	-0.0432	-0.0432	-0.0678
Pocillopora	-0.0052	-0.0194	-0.0194	-0.0056	-0.0056	-0.0078	-0.0038	-0.0038	0
Branching Acropora	-0.0002	-0.047	-0.047	-0.0014	-0.0014	-0.0708	-0.0076	-0.0076	-0.026
Bottlebrush Acropora	0	-0.0008	-0.0008	0	0	-0.0074	-0.001	-0.001	-0.0048
Corymbose Acropora	-0.0026	-0.0208	0.0561231	-0.0212	-0.0212	-0.0286	-0.004	-0.004	-0.0362
Coral rubble	-0.0742	0.0309091	-0.06	0.7362	0.7362	0.705578	-0.005	0.3075	0.337714
Dead corals	-0.1042	-0.0924	-0.0924	-0.1232	-0.1232	0.0112222	-0.0848	-0.0848	-0.0208
Encrusting corals	-0.0988	-0.1166	-0.1166	-0.0112	-0.0112	-0.0134	0.0139333	-0.0694	-0.0144
Mushroom corals	-0.002	-0.0008	-0.0008	-0.0002	-0.0002	0	0	0	-0.001
Leafy corals	0	-0.0118	-0.0118	-0.0002	-0.0002	0	-0.0084	-0.0084	0
Massive corals	-0.043	-0.037	0.501462	-0.0204	-0.0204	-0.0316	-0.0776	-0.0151	-0.0312
Rock	-0.0109429	0.436891	-0.0875846	-0.5134	-0.5134	-0.4344	0.225067	-0.0666	-0.0955143
Sand	0	0	0	-0.0322	-0.0322	-0.1028	0	0	-0.0088
Seaweed	0	0	0	0	0	0	0	0	0
Soft corals	-0.001	-0.015	-0.015	0	0	0	-0.001	-0.001	-0.002
Tabular corals	-0.0016	-0.0532	-0.0532	-0.004	-0.004	-0.009	-0.0004	-0.0004	-0.0184
Other corals	0.0714286	0	0	-0.0002	-0.0002	-0.0098	-0.0022	-0.0022	-0.0108

## Sheet: C. citrinellus
	Sample 1	Sample 2	Sample 3	Sample 4	Sample 5	Sample 6	Sample 7	Sample 8	Sample 9	Sample 10	Sample 11	Sample 12	Sample 13	Sample 14	Sample 15	Sample 16	Sample 17	Sample 18	Sample 19	Sample 20
Branching corals	-0.0134	-0.0134	-0.0134	-0.0134	-0.0348	0	0	-0.0432	-0.0432	-0.0432	-0.0432	-0.0432	-0.0538	0	0	0	0	0	-0.0102	-0.0102
Pocillopora	-0.0052	-0.0052	-0.0052	-0.0052	-0.0002	0.022041	-0.0036	0.0295333	-0.0038	-0.0038	-0.0038	-0.0038	0.00313585	0.1712	0.226519	0.0267556	0.0888471	0.0732408	-0.0074	0.113812
Branching Acropora	-0.0002	-0.0002	-0.0002	-0.0002	-0.0204	0	0	-0.0076	-0.0076	-0.0076	-0.0076	-0.0076	-0.00226415	-0.0002	-0.0002	-0.0002	-0.0002	-0.0002	-0.0186	-0.0186
Bottlebrush Acropora	0	0	0	0	-0.0016	0	0	0.0323333	-0.001	-0.001	-0.001	-0.001	-0.0006	0	0	0	0	0	0	0
Corymbose Acropora	-0.0026	0.0312983	0.027703	-0.0026	0.0609161	0.148646	-0.0052	-0.004	-0.004	0.262667	0.196	0.101263	0.631977	0.0309333	0.0614298	0.0531556	0.232894	0.0180082	0.561867	0.652776
Coral rubble	-0.0742	-0.0742	-0.0742	-0.0742	-0.0866	0	0	-0.005	-0.005	-0.005	-0.005	-0.005	-0.0228	0	0	0	0	0	0	0
Dead corals	-0.0803905	-0.1042	0.0170121	0.154421	-0.0694	-0.0128	-0.0128	-0.0848	-0.0848	-0.0848	-0.0848	-0.0848	-0.1084	-0.0062	0.0363532	-0.0062	-0.0062	-0.0062	-0.0458	-0.0458
Encrusting corals	0.234533	0.375776	0.173927	-0.0470759	0.239865	0.22501	0.150418	-0.00273333	0.19147	-0.0694	0.0639333	-0.0694	-0.0526604	0.3328	0.358332	-0.0672	0.197506	0.116473	-0.0156	0.014703
Mushroom corals	-0.002	-0.002	-0.002	-0.002	0	-0.0002	-0.0002	0	0	0	0	0	-0.0004	0	0	0	0	0	0	0
Leafy corals	0	0	0	0	0	-0.0002	-0.0002	-0.0084	-0.0084	-0.0084	-0.0084	-0.0084	-0.0034	0	0	0	0	0	0	0
Massive corals	0.599857	0.397678	0.26003	0.474241	0.232923	0.464379	0.159018	0.655733	0.400661	0.355733	0.2224	-0.0776	-0.068	-0.0118	-0.0118	-0.0118	0.0470235	0.335139	-0.0034	0.0572061
Rock	-0.6538	-0.602953	-0.381073	-0.481386	-0.274303	-0.821677	-0.307691	-0.6916	-0.561165	-0.3916	-0.324933	0.203137	-0.397864	-0.516133	-0.670034	0.00608889	-0.559271	-0.535861	-0.557667	-0.660697
Sand	0	0	0	0	-0.038	0	0	0	0	0	0	0	0	0	0	0	0	0	0	0
Seaweed	0	0	0	0	0	-0.0004	-0.0004	0	0	0	0	0	-0.0016	0	0	0	0	0	0	0
Soft corals	-0.001	-0.001	-0.001	-0.001	-0.004	-0.003	-0.003	-0.001	-0.001	-0.001	-0.001	-0.001	-0.015	-0.0002	-0.0002	-0.0002	-0.0002	-0.0002	-0.0186	-0.0186
Tabular corals	-0.0016	-0.0016	-0.0016	-0.0016	-0.001	0	0	0.132933	0.130035	-0.0004	-0.0004	-0.0004	0.0926755	-0.0002	-0.0002	-0.0002	-0.0002	-0.0002	0.1174	-0.0826
Other corals	0	0	0	0	-0.0034	-0.0218	0.0236545	-0.0022	-0.0022	-0.0022	-0.0022	-0.0022	-0.001	-0.0002	-0.0002	-0.0002	-0.0002	-0.0002	-0.002	-0.002

## Sheet: C. ephippium
	Sample 1	Sample 2	Sample 3	Sample 4	Sample 5	Sample 6	Sample 7	Sample 8	Sample 9	Sample 10	Sample 11	Sample 12	Sample 13	Sample 14	Sample 15	Sample 16
Branching corals	-0.0134	-0.0134	-0.003	-0.003	-0.0022	-0.0022	-0.0022	-0.0022	-0.1308	-0.1308	-0.012	-0.012	-0.0012	-0.0012	-0.0538	-0.053
Pocillopora	-0.0052	-0.0052	-0.0056	-0.0056	-0.0012	-0.0012	-0.0012	-0.0012	0	0	-0.0048	-0.0048	0	0	-0.0346	0.0758381
Branching Acropora	-0.0002	-0.0002	-0.0014	-0.0014	0	0	0	0	-0.0146	-0.0146	-0.0234	-0.0234	0	0	-0.04	-0.047
Bottlebrush Acropora	0	0	0	0	0	0	0	0	-0.0052	-0.0052	-0.0094	-0.0094	0	0	-0.0006	-0.0008
Corymbose Acropora	-0.0026	-0.0026	-0.0212	-0.0212	-0.0096	-0.0096	-0.0096	-0.0096	-0.0016	-0.0016	-0.0728	-0.0728	-0.0016	-0.0016	-0.0284	-0.0208
Coral rubble	-0.0742	-0.0742	0.26001	0.472049	-0.101	-0.101	-0.101	-0.0593333	-0.216857	-0.0634737	-0.172124	-0.3626	-0.085	-0.085	-0.0228	-0.06
Dead corals	0.867631	0.7958	0.305371	0.103215	0.375165	0.692567	0.796733	0.484233	0.736257	0.477611	0.179676	-0.0108	-0.1314	-0.105759	-0.1084	0.812362
Encrusting corals	-0.0988	-0.0988	0.036419	-0.0112	-0.0686	-0.0686	-0.0686	-0.0686	-0.0018	-0.0018	-0.0234	-0.0234	-0.0056	-0.0056	-0.147	-0.1166
Mushroom corals	-0.002	-0.002	-0.0002	-0.0002	-0.0012	-0.0012	-0.0012	-0.0012	-0.0018	-0.0018	-0.0006	-0.0006	0	0	-0.0004	-0.0008
Leafy corals	0	0	-0.0002	-0.0002	-0.0086	-0.0086	-0.0086	-0.0086	0	0	-0.0598	-0.0598	0	0	-0.0034	-0.0118
Massive corals	-0.0289155	-0.043	-0.0204	-0.0204	-0.0208	-0.0208	-0.0208	-0.0208	-0.0132	-0.0132	-0.0328	-0.016927	-0.016	-0.016	-0.068	-0.037
Rock	-0.639715	-0.5538	-0.5134	-0.475664	-0.123365	-0.440767	-0.544933	-0.2741	-0.1494	-0.0441368	0.289048	0.654127	0.2926	0.266959	0.5644	-0.4722
Sand	0	0	-0.0322	-0.0322	-0.0276	-0.0276	-0.0276	-0.0276	-0.1392	-0.1392	-0.0252	-0.0252	-0.0282	-0.0282	0	0
Seaweed	0	0	0	0	0	0	0	0	-0.0094	-0.0094	-0.0048	-0.0048	-0.005	-0.005	-0.0016	0
Soft corals	-0.001	-0.001	0	0	-0.0084	-0.0084	-0.0084	-0.0084	-0.021	-0.021	0	0	-0.0178	-0.0178	-0.015	-0.015
Tabular corals	-0.0016	-0.0016	-0.004	-0.004	-0.0026	-0.0026	-0.0026	-0.0026	-0.019	-0.019	-0.0274	-0.0274	0	0	-0.0394	-0.0532
Other corals	0	0	-0.0002	-0.0002	0	0	0	0	-0.0124	-0.0124	-0.0002	-0.0002	-0.0008	-0.0008	-0.001	0

## Sheet: C. kleinii
	Sample 1	Sample 2	Sample 3	Sample 4	Sample 5	Sample 6	Sample 7	Sample 8	Sample 9	Sample 10	Sample 11	Sample 12	Sample 13	Sample 14	Sample 15	Sample 16	Sample 17	Sample 18	Sample 19	Sample 20	Sample 21	Sample 22	Sample 23	Sample 24
Branching corals	-0.0134	-0.0022	-0.0958	-0.0958	-0.053	-0.0958	-0.0168	0.0513818	-0.0168	-0.0168	-0.0168	-0.0168554	-0.053	0.214493	-0.0538	0.000254054	-0.0538	-0.0088	-0.0432	0.4568	0.661367	0	0	0
Pocillopora	-0.0052	-0.0012	-0.0156	-0.0156	-0.0194	-0.0156	-0.0086	-0.0086	-0.0086	-0.0086	-0.0086	-0.0194	-0.0194	-0.0346	-0.0346	-0.0346	-0.0346	-0.008	-0.0038	-0.0038	0	-0.0036	-0.0036	-0.0288
Branching Acropora	-0.0002	0	-0.0713217	0.2852	-0.047	-0.1148	-0.031	-0.031	-0.031	-0.031	-0.031	-0.047	-0.047	-0.04	-0.04	-0.04	-0.04	0	-0.0076	-0.0076	-0.026	0	0	-0.0002
Bottlebrush Acropora	0	0	-0.0134	-0.0134	-0.0008	-0.0134	-0.0002	-0.0002	-0.0002	-0.0002	-0.0002	-0.0008	-0.0008	-0.0006	-0.0006	-0.0006	-0.0006	0	-0.001	-0.001	-0.0048	0	0	0
Corymbose Acropora	0.0926381	-0.0096	0.0972348	0.1668	-0.0208	0.3668	-0.0066	-0.0066	0.608785	-0.0066	-0.0066	-0.0208	0.1792	-0.0284	0.119748	-0.0284	0.0116	-0.0002	-0.004	-0.004	-0.0362	-0.0052	-0.0052	-0.0024
Coral rubble	-0.0742	-0.101	-0.021	-0.021	-0.06	-0.021	-0.0258	-0.0258	-0.0258	-0.0258	-0.0258	-0.06	-0.06	-0.0228	-0.0228	-0.0228	-0.0228	-0.026	-0.005	0.0616667	-0.448	0	0	0
Dead corals	-0.056581	-0.0366	-0.1092	-0.1092	-0.0924	0.2508	-0.1762	-0.1762	-0.1762	-0.1762	-0.1762	-0.0924	-0.0924	-0.1084	-0.1084	-0.1084	-0.1084	-0.0916	-0.0431333	-0.0514667	0.250033	-0.0128	-0.0128	0.0509429
Encrusting corals	0.37739	0.5314	0.626852	0.3312	0.0834	-0.0688	0.338061	0.200709	0.0136462	-0.0712345	0.228221	0.449665	0.4834	-0.0982195	0.556704	0.501649	0.453	0.724267	0.472267	0.0306	-0.0144	-0.0314	-0.0314	-0.0386286
Mushroom corals	-0.002	-0.0012	-0.0004	-0.0004	-0.0008	-0.0004	-0.0006	-0.0006	-0.0006	-0.0006	-0.0006	-0.0008	-0.0008	-0.0004	-0.0004	-0.0004	-0.0004	-0.0016	0	0	-0.001	-0.0002	-0.0002	0
Leafy corals	0	-0.0086	-0.009	-0.009	-0.0118	-0.009	-0.002	-0.002	-0.002	-0.002	-0.002	-0.0118	-0.0118	-0.0034	-0.0034	0.104708	-0.0034	-0.0162	-0.0084	0.0916	0	-0.0002	-0.0002	0
Massive corals	0.0998571	0.1792	0.00987826	-0.0336	0.763	0.2064	0.352304	0.551909	0.191769	0.547207	0.0662632	0.36059	0.163	0.200293	0.00607407	0.0941622	0.172	-0.0576	0.1724	-0.0442667	-0.0312	0.910533	0.643867	0.1882
Rock	-0.415705	-0.5116	-0.418	-0.418	-0.4722	-0.418	-0.5052	-0.5052	-0.5052	-0.160372	-0.136779	-0.4722	-0.4722	-0.4356	-0.4356	-0.4356	-0.4356	-0.496667	-0.6916	-0.524933	-0.3098	-0.831933	-0.565267	-0.168514
Sand	0	-0.0276	0	0	0	0	0	0	0	0	0	0	0	0	0	0	0	0	0	0	-0.0088	0	0	0
Seaweed	0	0	0	0	0	0	0	0	0	0	0	0	0	-0.0016	-0.0016	-0.0016	-0.0016	-0.0042	0	0	0	-0.0004	-0.0004	0
Soft corals	-0.001	-0.0084	0.0280783	-0.0154	-0.015	-0.0154	0.0974348	-0.033	-0.033	-0.033	-0.033	-0.015	-0.015	-0.015	-0.015	-0.015	-0.015	-0.0036	-0.001	-0.001	-0.002	-0.003	-0.003	-0.0002
Tabular corals	-0.0016	-0.0026	-0.00832174	-0.0518	-0.0532	-0.0518	-0.0148	-0.0148	-0.0148	-0.0148	0.143095	-0.0532	-0.0532	0.277673	0.0346741	-0.0394	0.0006	-0.0092	0.166267	-0.0004	-0.0184	0	0	-0.0002
Other corals	0	0	0	0	0	0	0	0	0	0	0	0	0	0.096561	-0.001	0.026027	0.079	-0.0006	-0.0022	-0.0022	-0.0108	-0.0218	-0.0218	-0.0002

## Sheet: C. vagabundus
	Sample 1	Sample 2	Sample 3	Sample 4	Sample 5	Sample 6	Sample 7	Sample 8	Sample 9	Sample 10	Sample 11	Sample 12	Sample 13	Sample 14	Sample 15	Sample 16	Sample 17	Sample 18	Sample 19	Sample 20	Sample 21	Sample 22	Sample 23	Sample 24	Sample 25	Sample 26	Sample 27	Sample 28	Sample 29
Branching corals	-0.003	-0.0174	-0.0174	-0.0174	-0.0012	-0.0012	-0.0012	-0.0958	-0.0134	-0.0134	-0.0022	-0.0022	-0.0022	-0.0538	-0.0538	-0.0538	-0.0538	-0.0538	-0.0088	-0.0432	-0.0432	-0.0432	-0.0678	-0.0348	-0.0348	0	0	0	0
Pocillopora	-0.0056	0	0	0	0.260057	-0.0078	-0.0078	-0.0156	-0.0052	-0.0052	-0.0012	-0.0012	-0.0012	-0.0346	-0.0346	-0.0346	-0.0346	-0.0346	-0.008	-0.0038	-0.0038	-0.0038	0	-0.0002	-0.0002	-0.0036	-0.0036	-0.0036	-0.0036
Branching Acropora	-0.0014	-0.0984	-0.0269714	-0.0269714	-0.0350857	-0.0708	-0.0708	-0.1148	-0.0002	-0.0002	0	0	0	-0.04	-0.04	-0.04	-0.04	-0.04	0	-0.0076	-0.0076	-0.0076	-0.026	-0.0204	-0.0204	0	0	0	0
Bottlebrush Acropora	0	-0.0592	-0.0592	-0.0592	-0.0074	-0.0074	-0.0074	-0.0134	0	0	0	0	0	-0.0006	-0.0006	-0.0006	-0.0006	-0.0006	0	-0.001	-0.001	-0.001	-0.0048	-0.0016	-0.0016	0	0	0	0
Corymbose Acropora	-0.0212	-0.0056	-0.0056	0.208686	-0.0286	-0.0286	-0.0286	-0.0332	-0.0026	-0.0026	-0.0096	-0.0096	-0.0096	-0.0284	-0.0284	-0.0284	-0.0284	-0.0284	-0.0002	-0.004	-0.004	-0.004	-0.0362	-0.0036	-0.0036	-0.0052	-0.0052	-0.0052	0.0573
Coral rubble	0.0362	-0.1382	0.0760857	0.218943	-0.2722	-0.2722	-0.2722	-0.021	-0.0742	-0.0742	-0.101	-0.101	-0.101	-0.0228	-0.0228	-0.0228	-0.0228	-0.0228	-0.026	-0.005	-0.005	-0.005	-0.448	0.103876	-0.0866	0	0	0	0
Dead corals	0.3268	-0.3492	-0.5492	-0.334914	-0.011	-0.011	-0.011	0.0336571	0.13493	-0.1042	-0.0366	-0.0366	-0.0366	-0.1084	-0.1084	-0.1084	-0.1084	-0.1084	-0.0916	-0.0848	-0.0848	-0.0570222	0.0903111	-0.0694	0.0139333	0.1122	-0.0128	-0.0128	-0.0128
Encrusting corals	-0.0112	-0.0022	0.0692286	-0.0022	-0.0134	-0.0134	-0.0134	-0.0688	0.249026	0.567867	-0.0686	-0.0686	-0.0686	-0.147	-0.147	-0.147	-0.147	-0.147	-0.1924	-0.0694	-0.0694	-0.0694	-0.0144	-0.0182	-0.0182	0.0102667	-0.0314	-0.0314	-0.0314
Mushroom corals	-0.0002	0.0392667	-0.0274	0.0440286	0	0	0	-0.0004	-0.002	-0.002	-0.0012	-0.0012	-0.0012	-0.0004	-0.0004	-0.0004	-0.0004	-0.0004	-0.0016	0	0	0	-0.001	0	0	-0.0002	-0.0002	-0.0002	-0.0002
Leafy corals	-0.0002	-0.0318	-0.0318	-0.0318	0	0	0	-0.009	0	0	-0.0086	-0.0086	-0.0086	-0.0034	-0.0034	-0.0034	-0.0034	-0.0034	-0.0162	-0.0084	-0.0084	-0.0084	0	0	0	-0.0002	-0.0002	-0.0002	-0.0002
Massive corals	0.0296	0.131733	-0.0016	-0.0016	0.182686	0.0896121	-0.0316	0.44259	0.261348	-0.043	0.9792	0.0945846	0.9792	-0.068	-0.068	-0.00133333	0.284941	0.057	0.7024	-0.0776	-0.0776	-0.0776	-0.0312	-0.00978095	0.109267	0.0605333	0.0206783	-0.0228	0.3522
Rock	-0.3134	0.5526	0.595457	0.0240286	0.0120286	0.444388	0.5656	-0.0370476	-0.545104	-0.320467	-0.7116	0.173015	-0.7116	0.5644	0.5644	0.497733	0.211459	0.4394	-0.34	0.3084	0.3084	0.280622	0.579089	0.100505	0.0886	-0.1486	-0.289904	-0.2986	-0.3361
Sand	-0.0322	0	0	0	-0.1028	-0.1028	-0.1028	0	0	0	-0.0276	-0.0276	-0.0276	0	0	0	0	0	0	0	0	0	-0.0088	-0.038	-0.038	0	0	0.1	0
Seaweed	0	-0.0192	-0.0192	-0.0192	0	0	0	0	0	0	0	0	0	-0.0016	-0.0016	-0.0016	-0.0016	-0.0016	-0.0042	0	0	0	0	0	0	-0.0004	-0.0004	-0.0004	-0.0004
Soft corals	0	-0.0022	-0.0022	-0.0022	0	0	0	-0.0154	-0.001	-0.001	-0.0084	-0.0084	-0.0084	-0.015	-0.015	-0.015	-0.015	-0.015	-0.0036	-0.001	-0.001	-0.001	-0.002	-0.004	-0.004	-0.003	0.344826	0.297	-0.003
Tabular corals	-0.004	-0.0002	-0.0002	-0.0002	0.0267143	-0.009	-0.009	-0.0518	-0.0016	-0.0016	-0.0026	-0.0026	-0.0026	-0.0394	-0.0394	-0.0394	-0.0394	-0.0394	-0.0092	-0.0004	-0.0004	-0.0004	-0.0184	-0.001	-0.001	0	0	0	0
Other corals	-0.0002	0	0	0	-0.0098	-0.0098	-0.0098	0	0	0	0	0	0	-0.001	-0.001	-0.001	-0.001	-0.001	-0.0006	-0.0022	-0.0022	-0.0022	-0.0108	-0.0034	-0.0034	-0.0218	-0.0218	-0.0218	-0.0218

## Sheet: F. flavissimus
	Sample 1	Sample 2	Sample 3	Sample 4	Sample 5	Sample 6	Sample 7	Sample 8	Sample 9	Sample 10	Sample 11	Sample 12	Sample 13	Sample 14	Sample 15	Sample 16	Sample 17	Sample 18	Sample 19	Sample 20	Sample 21	Sample 22
Branching corals	-0.0134	-0.0958	-0.0958	-0.0958	-0.0958	-0.0958	-0.0168	-0.0168	-0.053	-0.053	-0.0174	-0.0012	-0.0012	0	0	0	0	0	0	-0.0102	-0.0102	-0.0046
Pocillopora	-0.0052	-0.0156	-0.0156	-0.0156	-0.0156	-0.0156	-0.0086	-0.0086	-0.0194	0.0472667	0	-0.0078	-0.0078	-0.0036	0.0267556	0.0481231	-0.0288	-0.0288	-0.0288	-0.0074	0.761831	-0.016
Branching Acropora	-0.0002	-0.1148	-0.1148	-0.1148	-0.1148	-0.1148	-0.031	-0.031	-0.047	-0.047	-0.0428444	-0.0708	0.000628571	0	-0.0002	-0.0002	-0.0002	-0.0002	-0.0002	-0.0186	-0.0186	-0.0236
Bottlebrush Acropora	0	-0.0134	-0.0134	-0.0134	-0.0134	-0.0134	-0.0002	-0.0002	-0.0008	-0.0008	-0.0592	-0.0074	-0.0074	0	0	0	0	0	0	0	0	0
Corymbose Acropora	-0.0026	0.833467	0.575496	-0.0332	0.0668	0.0501333	0.224169	0.839554	0.0792	0.312533	-0.0056	-0.0286	-0.0286	-0.0052	-0.0024	-0.0024	-0.0024	-0.0024	-0.0024	-0.1048	-0.1048	0.258133
Coral rubble	-0.0742	-0.021	-0.021	-0.021	-0.021	-0.021	-0.0258	-0.0258	0.14	-0.06	0.584022	-0.2722	-0.2722	0	0	0	0	0	0	0	0	0
Dead corals	-0.1042	-0.1092	-0.1092	-0.1092	-0.1092	-0.1092	-0.1762	-0.1762	-0.0924	-0.0924	-0.493644	0.089	0.0604286	0.294892	-0.0062	-0.0062	-0.0062	-0.0062	-0.0062	-0.0458	-0.0458	-0.0442
Encrusting corals	-0.0988	-0.0688	-0.0253217	-0.0688	-0.0688	-0.0688	-0.1402	-0.1402	-0.1166	-0.1166	-0.0022	-0.0134	-0.0134	-0.0314	-0.0672	-0.0672	0.0237091	-0.0672	-0.0672	-0.0156	-0.0156	-0.0152
Mushroom corals	-0.002	-0.0004	-0.0004	-0.0004	-0.0004	-0.0004	-0.0006	-0.0006	-0.0008	-0.0008	0.0281556	0	0	-0.0002	0	0	0	0	0	0	0	0
Leafy corals	0	-0.009	-0.009	-0.009	-0.009	-0.009	-0.002	-0.002	-0.0118	-0.0118	-0.0318	0	0	-0.0002	0	0	0	0	0	0	0	0
Massive corals	0.057	-0.0336	-0.0336	-0.0336	-0.0336	-0.0336	-0.039	-0.039	-0.037	-0.037	0.0539556	-0.0316	-0.0316	-0.0228	-0.0118	-0.0118	-0.0118	-0.0118	-0.0118	-0.0034	-0.0034	-0.0052
Rock	0.2462	-0.284667	-0.15713	0.0365455	0.282	-0.209667	0.264031	-0.466738	0.0278	0.1278	0.00815556	0.4656	0.422743	-0.283215	0.0616444	0.0402769	0.0262909	0.1172	0.1172	0.309	-0.460231	-0.0763333
Sand	0	0	0	0	0	0	0	0	0	0	0	-0.1028	-0.1028	0	0	0	0	0	0	0	0	0
Seaweed	0	0	0	0	0	0	0	0	0	0	-0.0192	0	0	-0.0004	0	0	0	0	0	0	0	0
Soft corals	-0.001	-0.0154	-0.0154	-0.0154	-0.0154	-0.0154	-0.033	-0.033	-0.015	-0.015	-0.0022	0	0	-0.003	-0.0002	-0.0002	-0.0002	-0.0002	-0.0002	-0.0186	-0.0186	-0.0188
Tabular corals	-0.0016	-0.0518	0.0351565	0.493655	0.1482	0.656533	-0.0148	0.100585	0.1468	-0.0532	-0.0002	-0.009	-0.009	0	-0.0002	-0.0002	-0.0002	-0.0002	-0.0002	-0.0826	-0.0826	-0.0542
Other corals	0	0	0	0	0	0	0	0	0	0	0	-0.0098	-0.0098	0.0551231	-0.0002	-0.0002	-0.0002	-0.0002	-0.0002	-0.002	-0.002	0
