# Supplementary material for: Spatial distribution and feeding substrate of butterflyfishes (family Chaetodontidae) on an Okinawan coral reef
Source: PeerJ. 2020 Aug 4;8:e9666. doi: 10.7717/peerj.9666 (PMC7413084; doi:10.7717/peerj.9666)
Supplement: Supplemental Information 14 [file peerj-08-9666-s014.xlsx]

## Sheet: Sheet1
(A) Substrate vectors (no. of bites)				(B) Species scores (no. of bites)
	PCA axis 1	PCA axis 2			PCA axis 1	PCA axis 2
Bottle-brushed Acropora	0.017	0.016		C. arg	-9.75	0.436	Facultative coral polyp feeder
Branching Acropora	0.111	-0.105		C. aur	-7.61	-1.38	Facultative coral polyp feeder
Branching corals	0.048	0.052		C. bar	6.4	-3.04	Obligate coral polyp feeder
Coral rubble	-0.117	-0.016		C. ben	5.75	9	Obligate coral polyp feeder
Corymbose Acropora	0.355	-0.693		C. cit	-0.762	1.28	Facultative coral polyp feeder
Dead corals	-0.294	-0.017		C. eph	-21.1	-1.33	Facultative coral polyp feeder
Encrusting corals	0.499	0.471		C. kle	1.69	4.15	Facultative coral polyp feeder
Leafy corals	0.036	0.048		C. lun	12.8	10	Obligate coral polyp feeder
Massive corals	0.336	0.354		C. ple	2.88	3.62	Obligate coral polyp feeder
Mushroom corals	0.018	0.026		C. pun	7.43	5.12	Obligate coral polyp feeder
Other corals	0.011	0.014		C. tri	8.51	-24	Obligate coral polyp feeder
Pocillopora	0.088	-0.035		C. vag	-11.9	1.82	Facultative coral polyp feeder
Rock	-0.582	0.032		F. fla	-8.53	-2.52	Non-coralline invertebrate feeder
Sand	0	0		P. orn	14.2	-3.15	Obligate coral polyp feeder
Seaweed	0	0
Soft corals	-0.001	0.005
Tabular Acropora	0.221	-0.39
(C) Substrate vectors (substrate selection)				(D) Species scores (substrate selection)
	PCA axis 1	PCA axis 2			PCA axis 1	PCA axis 2
Bottlebrush Acropora	0.009	0.013		C. arg	-0.211	0.0614	Facultative coral polyp feeder
Branching Acropora	0.037	-0.107		C. aur	-0.35	0.13	Facultative coral polyp feeder
Branching corals	0.034	0.054		C. bar	0.224	-0.107	Obligate coral polyp feeder
Coral rubble	-0.163	0.271		C. ben	0.313	0.177	Obligate coral polyp feeder
Corymbose Acropora	0.086	-0.723		C. cit	0.116	-0.039	Facultative coral polyp feeder
Dead corals	-0.223	0.048		C. eph	-0.405	0.0438	Facultative coral polyp feeder
Encrusting corals	0.45	0.376		C. kle	0.175	0.0862	Facultative coral polyp feeder
Leafy corals	0.048	0.081		C. lun	0.225	0.0832	Obligate coral polyp feeder
Massive corals	0.38	0.226		C. orn	0.218	-0.0833	Obligate coral polyp feeder
Mushroom corals	0.01	0.017		C. ple	0.143	0.106	Obligate coral polyp feeder
Other corals	0.007	0.014		C. pun	0.364	0.0543	Obligate coral polyp feeder
Pocillopora	0.032	-0.042		C. tri	-0.00857	-0.533	Obligate coral polyp feeder
Rock	-0.749	0.162		C. vag	-0.386	0.0945	Facultative coral polyp feeder
Sand	0.009	0		F. fla	-0.418	-0.0738	Non-coralline invertebrate feeder
Seaweed	0	0.001
Soft corals	-0.006	0.01
Tabular Acropora	0.044	-0.399
