# Supplementary material for: Spatial distribution and feeding substrate of butterflyfishes (family Chaetodontidae) on an Okinawan coral reef
Source: PeerJ. 2020 Aug 4;8:e9666. doi: 10.7717/peerj.9666 (PMC7413084; doi:10.7717/peerj.9666)
Supplement: Table S1 — Species that were found at the 68 sites in the present study were shown at upper side of the table. The high density species for each dietary group (7 species of obligate coral polyp feeder, 6 species for facultative coral polyp feeder and 1 species for non-coralline invertebrate feeder) were selected for the analysis (indicated as +). Species that were not found at the 68 sites were also shown in the lower side of the table. For the species at lower side of the table, dietary group were not shown. Dietary group are represented as abbreviations: O, obligate coral polyp feeder; F, facultative coral polyp feeders; N, non-coralline invertebrate feeder, P, Plankton feeder. [file peerj-08-9666-s003.xlsx]

## Sheet: Table S1
Table S1. List of butterflyfishes that are recorded at Okinawan coral reefs in accordance with Nakabo (2000).
Species that were found at the 68 sites in the present study were shown at upper side of the table. The high density
species for each dietary group (7 species of obligate coral polyp feeder, 6 species for facultative coral polyp feeder and
1 species for non-coralline invertebrate feeder) were selected for the analysis (indicated as +). Species that were not
found at the 68 sites were also shown in the lower side of the table. For the species at lower side of the table,
dietary group were not shown. Dietary group are represented as abbreviations: O, obligate coral polyp feeder;
F, facultative coral polyp feeders; N, non-coralline invertebrate feeder, P, Plankton feeder.
Species that were found	Species name	Dietary group	Analysis	Average density at 68 sites
at the present study sites				(no of individuals / 500 m2)
	Chaetodon lunulatus	O	+	3.84336
	C. plebeius	O	+	0.580985
	C. trifascialis	O	+	0.355723
	C. bennetti	O	+	0.344225
	C. punctatofasciatus	O	+	0.283888
	C. baronessa	O	+	0.153864
	C. ornatissimus	O	+	0.112381
	C. speculum	O		0.102073
	Heniochus singularius	O		0.0907934
	Chetodon kleinii	F	+	1.01071
	C. auriga	F	+	0.782289
	C. vagabundus	F	+	0.563024
	C. argentatus	F	+	0.546813
	C. ephippium	F	+	0.261196
	C. citrinellus	F	+	0.215715
	Heniochus varius	F		0.206232
	C. auripes	F		0.200287
	C. unimaculatus	F		0.151137
	C. melannotus	F		0.14363
	Hen. chrysostomus	F		0.0841538
	Hen. acuminatus	F		0.0420838
	Forcipiger flavissimus	N	+	0.740164
	Hen. monoceros	N		0.12008
	C. ulietensis	N		0.092267
	Chaetodon rafflesi	N		0.0734376
	Hemitaurichthys polylepis	P		0.313474
Species that were not found	Chaetodon adiergastos			-
at the present study sites	C. guentheri			-
	C. lineolatus			-
	C. lunula			-
	C. mertensii			-
	C. meyeri			-
	C. modestus			-
	C. nippon			-
	C. octofasciatus			-
	C. oxycephalus			-
	C. quadrimaculatus			-
	C. reticulatus			-
	C. selene			-
	C. semeion			-
	C. wiebeli			-
	C. xanthurus			-
	Chelmon rostratus			-
	F. longirostris			-
	Hen. diphreutes			-
