# Supplementary material for: Spatial distribution and feeding substrate of butterflyfishes (family Chaetodontidae) on an Okinawan coral reef
Source: PeerJ. 2020 Aug 4;8:e9666. doi: 10.7717/peerj.9666 (PMC7413084; doi:10.7717/peerj.9666)
Supplement: Table S2 [file peerj-08-9666-s004.xlsx]

## Sheet: Table S2
Table S2. Summary of dietary group for 14 butterflyfish species.
Species	Dietary group	Evidence	Reference
Chaetodon baronessa	Obligate coral polyp feeder	Stomach contents, Observation	Sano, Shimizu & Nose (1984), Pratchett (2005)
C. bennetti	Obligate coral polyp feeder	Stomach contents	Sano, Shimizu & Nose (1984)
C. lunulatus	Obligate coral polyp feeder	Stomach contents, Observation	Sano, Shimizu & Nose (1984), Pratchett (2005)
C. ornatissimus	Obligate coral polyp feeder	Stomach contents	Sano, Shimizu & Nose (1984)
C. plebeius	Obligate coral polyp feeder	Stomach contents, Observation	Sano, Shimizu & Nose (1984), Pratchett (2005)
C. punctatofasciatus	Obligate coral polyp feeder	Stomach contents	Sano (1989)
C. trifascialis	Obligate coral polyp feeder	Stomach contents, Observation	Sano, Shimizu & Nose (1984), Pratchett (2005)
C. argentatus	Facultative coral polyp feeder	Stomach contents	Sano (1989)
C. auriga	Facultative coral polyp feeder	Stomach contents	Sano, Shimizu & Nose (1984)
C. citrinellus	Facultative coral polyp feeder	Stomach contents, Observation	Sano, Shimizu & Nose (1984), Pratchett (2005)
C. ephippium	Facultative coral polyp feeder	Stomach contents	Sano, Shimizu & Nose (1984)
C. kleinii	Facultative coral polyp feeder	Stomach contents, Observation	Sano, Shimizu & Nose (1984), Sano (1989), Pratchett (2005)
C. vaganbundus	Facultative coral polyp feeder	Stomach contents	Sano, Shimizu & Nose (1984)
Forcipiger flavissimus	Non-coralline invertebrate feeder	Stomach contents	Sano (1989)
