# Supplementary material for: Spatial distribution and feeding substrate of butterflyfishes (family Chaetodontidae) on an Okinawan coral reef
Source: PeerJ. 2020 Aug 4;8:e9666. doi: 10.7717/peerj.9666 (PMC7413084; doi:10.7717/peerj.9666)
Supplement: Table S3 — *: significant difference after Bonferroni correction. [file peerj-08-9666-s005.xlsx]

## Sheet: Table S3
Table S3. Average number of individuals, standard deviations (SD) and results of generalized linear mixed model
(GLMM) for 14 butterflyfish species. *: significant difference after Bonferroni correction.
	Average No. of Individuals ± SD			GLMM
Species	Exposed reef	Inner reef		z-value	p-value
Chaetodon baronessa	0.26 ± 0.55	0.06 ± 0.30		2.08	0.0375
C. bennetti	0.43 ± 1.19	0.30 ± 0.44		-2.756	0.00586
C. lunulatus	3.32 ± 2.66	4.63 ± 4.20		0.863	0.388
C. ornatissimus	0.23 ± 0.37	0.01 ± 0.05		2.702	0.00688
C. plebeius	0.93 ± 1.00	0.30 ± 0.52		2.58	0.00987
C. punctatofasciatus	0.44 ± 0.93	0.17 ± 0.52		2.212	0.027
C. trifascialis	0.38 ± 0.69	0.37 ± 0.55		-1.567	0.117
C. argentatus	0.61 ± 0.83	0.64 ± 0.86		0.079	0.937
C. auriga	0.46 ± 0.72	1.24 ± 0.86		-2.5	0.0124
C. citrinellus	0.49 ± 0.68	0 ± 0		-4.365	< 0.001*
C. ephippium	0.22 ± 0.29	0.34 ± 0.48		-0.932	0.351
C. kleinii	1.60 ± 1.87	0.61 ± 0.84		1.006	0.3145
C. vaganbundus	0.92 ± 1.00	0.34 ± 0.48		2.236	0.02534
Forcipiger flavissimus	1.46 ± 1.12	0.19 ± 0.35		3.679	< 0.001*
