# Supplementary material for: Spatial distribution and feeding substrate of butterflyfishes (family Chaetodontidae) on an Okinawan coral reef
Source: PeerJ. 2020 Aug 4;8:e9666. doi: 10.7717/peerj.9666 (PMC7413084; doi:10.7717/peerj.9666)
Supplement: Table S4 — *: significant difference after Bonferroni correction. [file peerj-08-9666-s006.xlsx]

## Sheet: Table S4
Table S4. Average coverage, standard deviations (SD) and results of generalized linear mixed model (GLMM) for 17 substrates.
*: significant difference after Bonferroni correction.
	Average (%) ± SD			GLMM
Substrates	Exposed reef	Inner reef		z-value	p-value
Branching Acropora	1.60 ± 1.02	8.34 ± 10.42		-1.351	0.177
Bottlebrush Acropora	0.21 ± 0.23	3.25 ± 5.95		-1.238	0.216
Tabular Acropora	1.86 ± 1.53	1.24 ± 1.96		-0.002	0.998
Corymbose Acropora	0.28 ± 0.19	0.10 ± 0.33		1.034	0.301
Pocillopora	0.49 ± 0.25	0.10 ± 0.38		2.469	0.0136
Branching corals	1.58 ± 0.94	1.65 ± 1.75		-1.573	0.116
Encrusting corals	7.44 ± 2.96	0.49 ± 1.19		-5.9	< 0.001*
Leafy corals	1.01 ± 1.11	0.15 ± 0.56		0	>0.999
Massive corals	3.02 ± 1.10	1.73 ± 2.98		0	>0.999
Mushroom corals	0.03 ± 0.05	0.26 ± 1.19		0.001	0.999
Other corals	0.03 ± 0.05	0.05 ± 0.23		0	>0.999
Soft corals	1.78 ± 1.15	0.21 ± 1.10		1.229	0.219
Dead corals	3.15 ± 1.34	12.84 ± 14.87		4.652	< 0.001*
Coral rubble	2.38 ± 1.90	19.96 ± 17.14		6.892	< 0.001*
Rock	67.02 ± 9.09	12.07 ± 14.41		-9.626	< 0.001*
Sand	8.14 ± 5.34	32.02 ± 25.27		3.32	< 0.001*
Macroalgae	0 ± 0	4.52 ± 8.93		2.698	0.007
